# Supplementary material
Source: PubMed Central journal article supplement (PMC3343463)
Supplement: emboj201260s1.pdf [file emboj201260s1.pdf]

**A unique role of Cohesin-SA1 in gene regulation and development**

Silvia Remeseiro<sup>1\*</sup>, Ana Cuadrado<sup>1\*</sup>, Gonzalo Gómez-López<sup>2</sup>, David G. Pisano<sup>2</sup> and  
Ana Losada<sup>1#</sup>

**Supplementary Figure Legends**

**Figure S1. SA2 expression remains unchanged in SA1-null embryos.**

(A) Immunohistochemistry with SA1 and SA2 antibodies performed on tissue sections from wild-type and SA1-null E17.5 embryos. Scale bars, 5mm. I. Brain cortex. Scale bars, 100  $\mu$ m. II. Interscapular adipose tissue. Scale bars, 50  $\mu$ m. III. Skin. Scale bars, 50  $\mu$ m. IV. Liver. Scale bars, 200  $\mu$ m. V. Kidney. Scale bars, 50  $\mu$ m. (B) Immunoblot analysis of brains from wild-type and SA1-null E17.5 embryos with the indicated antibodies. Tubulin was used as loading control. (C) mRNA levels of all cohesin complex subunits in brains from SA1-null E17.5 embryos relative to the wild-type littermates (3 embryos per genotype and 3 independent qPCR reactions per condition).

**Figure S2. Chip-seq validation.**

(A) Antibodies against SA1, SA2, SMC1 and SMC3 used for ChIP were previously tested for immunoprecipitation using a mouse cell extract enriched in chromatin-bound proteins. Immunoblot analysis with an antibody against Rad21, a subunit common to both cohesin-SA1 and cohesin-SA2, was used to assess the efficiency of the immunoprecipitation reactions. (B) Antibody validation for ChIP was done by ChIP-

qPCR analysis of SA1 and SA2 binding to mouse IFN $\gamma$  locus (Hadjur et al., 2009), performed with chromatin from C2C12 mouse myoblasts treated with either mock, SA1 or SA2 siRNAs. **(C)** ChIP-qPCR validation of binding sites identified for SA1, SA2, SMC1 and SMC3 by ChIP-sequencing in wild-type and SA1-null MEFs. Regions with high cohesin occupancy (SA1 positive), low cohesin occupancy (SA1 negative), and negative for cohesin (negative) are shown. Dotted lines indicate the background level (cohesin binding in a negative region) for each antibody. Same analysis was performed for myc promoter and an adjacent negative region **(D)** and for Pcdh genes **(E)**. Bars in (C-E) represent the average of two independent experiments performed with two different clones of MEFs per genotype.

**Figure S3. Peak overlapping analysis.**

**(A)** Venn diagrams showing the overlap between the binding sites identified for each cohesin subunit (SA1, SA2, SMC1 and SMC3) and CTCF (from Yale Dataset) in wild-type cells. **(B)** Additional Venn diagrams showing the overlap between the indicated groups of binding sites. **(C)** Representative image of the browser showing the redistribution of SMC1 and SMC3 in SA1-null cells with respect to wild-type cells.

**Figure S4. Validation of microarray data.**

Validation of microarray data from wild-type and SA1-null MEFs performed by RT-qPCR (2 different clones per genotype and 3 independent qPCR reactions). Values are represented as log<sub>2</sub> of fold change (FC) versus wild-type. For statistical analysis, a two-tailed Student's t-test was done (\*\*p<0.01, \*p<0.05).

**Figure S5. GSEA analysis of Myc target genes.**

Gene set enrichment plot of the indicated Myc targets tested in microarrays from SA1-null and wild-type MEFs.

**Figure S6. Cohesin-SA1 regulates skin-related genes.**

(A) Gene set enrichment plot of the indicated skin-related genes tested in microarrays from SA1-null and wild-type MEFs. (B) Distribution of cohesin binding sites at the Cxcl cluster located on chromosome 5.





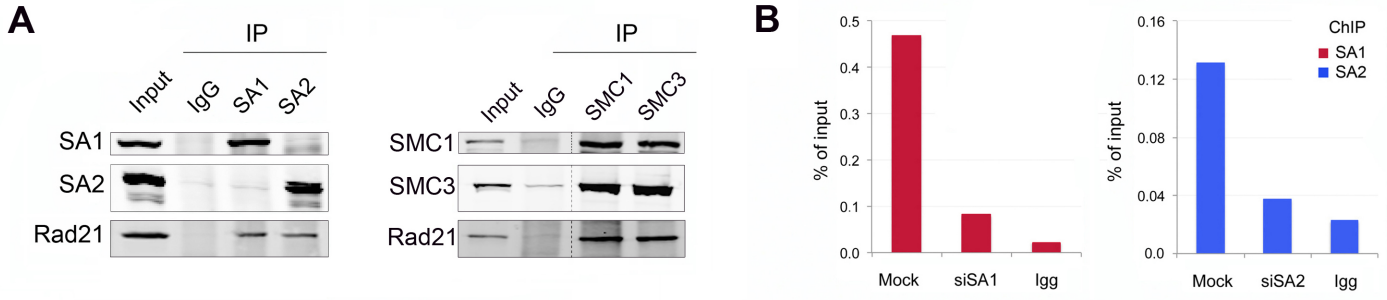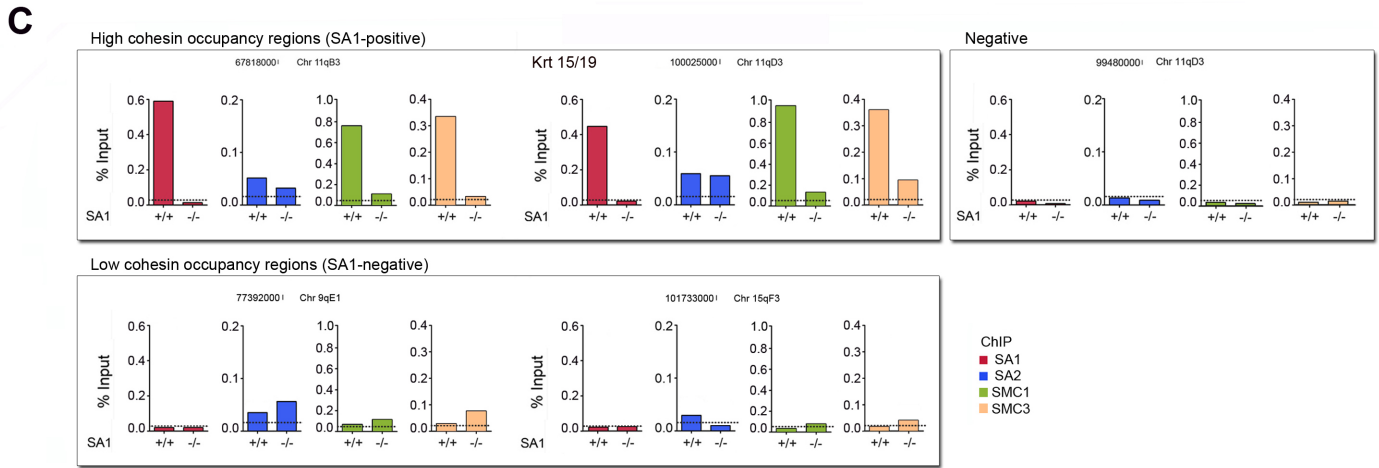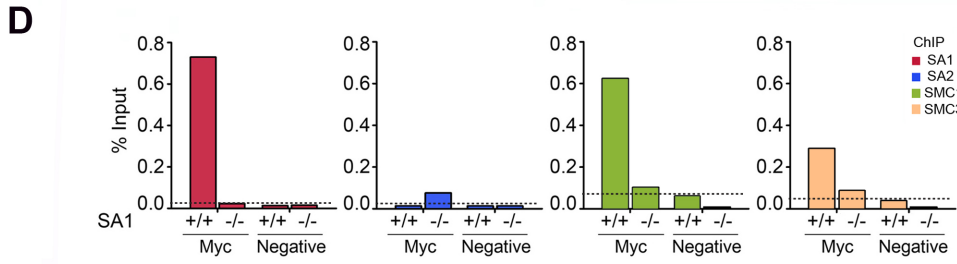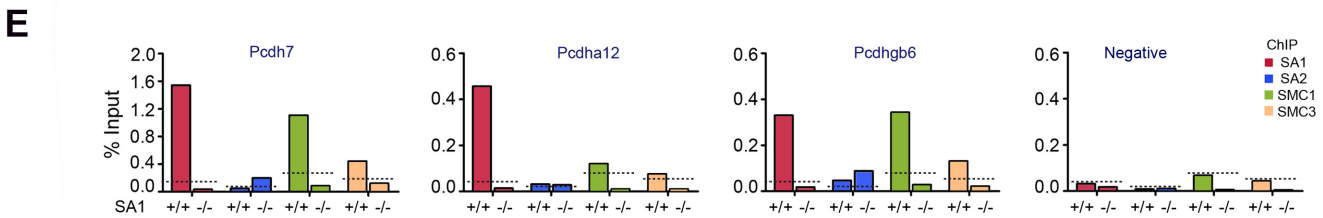

A

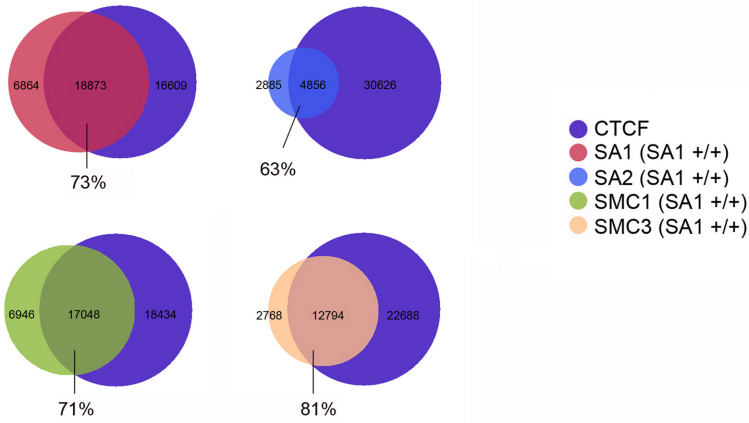

B

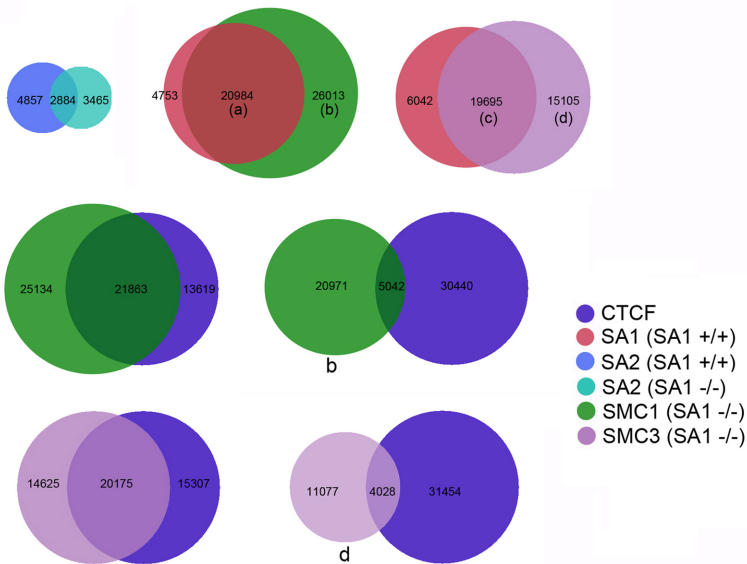

C

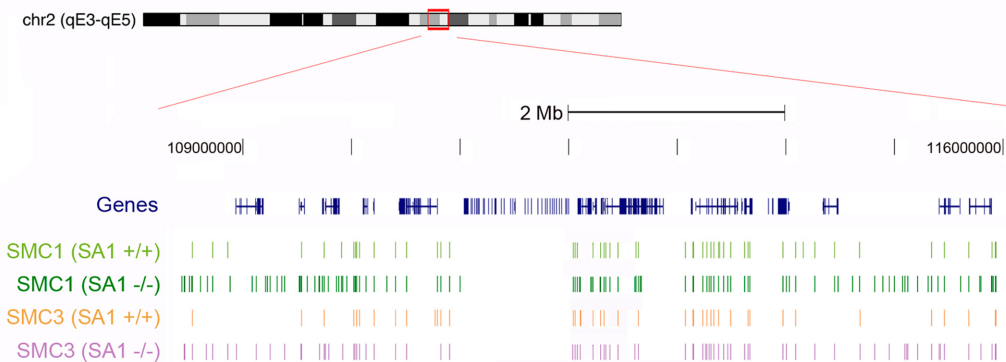

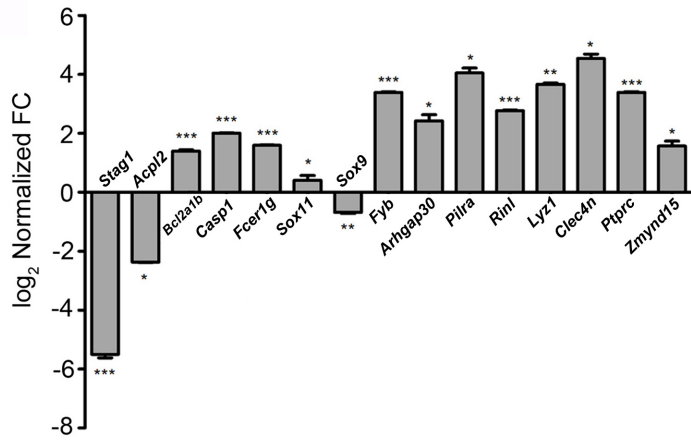

GSEA enrichment plot for MYC targets

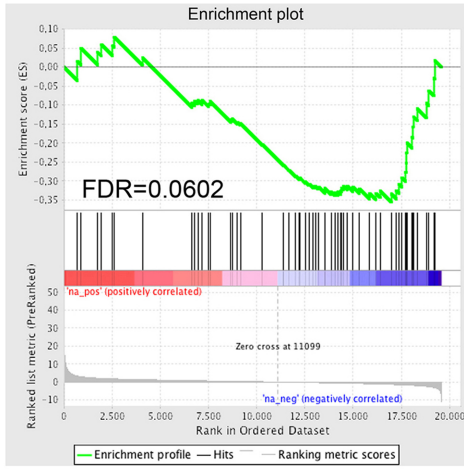

MYC targets gene set

|                 |                 |               |
|-----------------|-----------------|---------------|
| <i>Prdx1</i>    | <i>Pla2g6</i>   | <i>Abce1</i>  |
| <i>Tardbp</i>   | <i>Rplp1</i>    | <i>Mat2b</i>  |
| <i>Incenp</i>   | <i>Naca</i>     | <i>Tcfap4</i> |
| <i>Rps27l</i>   | <i>Mcm5</i>     | <i>Iars</i>   |
| <i>Atpif1</i>   | <i>Bc031781</i> | <i>Nolc1</i>  |
| <i>Rpl7</i>     | <i>Rps19</i>    | <i>Rsl1d1</i> |
| <i>Sp1</i>      | <i>Uhrf1</i>    | <i>Nvl</i>    |
| <i>Slc9a8</i>   | <i>Gars</i>     | <i>Mthfd1</i> |
| <i>Laptm4a</i>  | <i>Arv1</i>     | <i>Rps25</i>  |
| <i>Mrpl50</i>   | <i>Sf3a1</i>    | <i>Nmd3</i>   |
| <i>Zcchc7</i>   | <i>Cct7</i>     | <i>Ddb1</i>   |
| <i>Bre</i>      | <i>Kif20a</i>   | <i>Luc7l</i>  |
| <i>Rps3</i>     | <i>Rplp2</i>    | <i>Nek8</i>   |
| <i>Slc3a2</i>   | <i>Ubap2</i>    | <i>Tcp1</i>   |
| <i>Snrpa</i>    | <i>Atad3a</i>   | <i>Eef2</i>   |
| <i>St13</i>     | <i>Xpo5</i>     | <i>Ppan</i>   |
| <i>Hspd1</i>    | <i>Eef1b2</i>   | <i>Ddx39</i>  |
| <i>Nudcd2</i>   | <i>Ranbp1</i>   | <i>Rpl32</i>  |
| <i>Cstf1</i>    | <i>Cct4</i>     | <i>Atf4</i>   |
| <i>Ebna1bp2</i> | <i>Paics</i>    |               |



**A**

GSEA enrichment plots for skin gene set

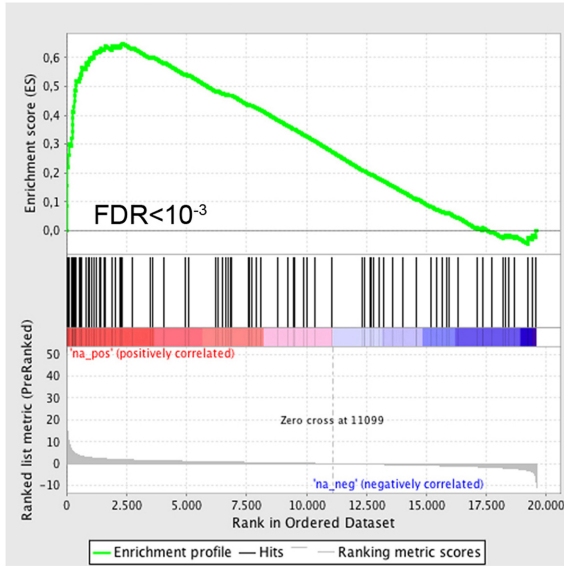

Skin gene set

|               |                 |                |                  |               |               |
|---------------|-----------------|----------------|------------------|---------------|---------------|
| <i>Areg</i>   | <i>Cxcl13</i>   | <i>Il18rap</i> | <i>Krt25</i>     | <i>Lce1b</i>  | <i>S100a5</i> |
| <i>Btc</i>    | <i>Cxcl14</i>   | <i>Il18rb</i>  | <i>Krt27</i>     | <i>Lce1c</i>  | <i>S100a8</i> |
| <i>Ccl11</i>  | <i>Cxcl16</i>   | <i>Il1a</i>    | <i>Krt28</i>     | <i>Lce1d</i>  | <i>S100b</i>  |
| <i>Ccl12</i>  | <i>Cxcl2</i>    | <i>Il1b</i>    | <i>Krt32</i>     | <i>Lce1f</i>  | <i>Scnn1a</i> |
| <i>Ccl19</i>  | <i>Cxcl5</i>    | <i>Il1f8</i>   | <i>Krt6a</i>     | <i>Lce1h</i>  | <i>Sprr1a</i> |
| <i>Ccl2</i>   | <i>Cxcl9</i>    | <i>Il1r2</i>   | <i>Krt6b</i>     | <i>Lce1i</i>  | <i>Sprr1b</i> |
| <i>Ccl20</i>  | <i>Defb1</i>    | <i>Il2ra</i>   | <i>Krt7</i>      | <i>Lce3a</i>  | <i>Sprr2a</i> |
| <i>Ccl3</i>   | <i>Defb3</i>    | <i>Il2rg</i>   | <i>Krt71</i>     | <i>Lce3c</i>  | <i>Sprr2d</i> |
| <i>Ccl4</i>   | <i>Defb6</i>    | <i>Il33</i>    | <i>Krt75</i>     | <i>Lcn2</i>   | <i>Sprr2f</i> |
| <i>Ccl5</i>   | <i>Epgn</i>     | <i>Il4ra</i>   | <i>Krt77</i>     | <i>Lcn8</i>   | <i>Sprr2i</i> |
| <i>Ccl6</i>   | <i>Fil</i>      | <i>Il6</i>     | <i>Krt79</i>     | <i>Lor</i>    | <i>Sprr2j</i> |
| <i>Ccl8</i>   | <i>Flg</i>      | <i>Itgal</i>   | <i>Krt8</i>      | <i>Lpo</i>    | <i>Sprr2k</i> |
| <i>Ccl9</i>   | <i>Fos</i>      | <i>Itgam</i>   | <i>Krt80</i>     | <i>Mmp10</i>  | <i>Tchh</i>   |
| <i>Ccr1</i>   | <i>FosL1</i>    | <i>Itgb2</i>   | <i>Krt83</i>     | <i>Mmp12</i>  | <i>Tgfa</i>   |
| <i>Ccr2</i>   | <i>FosL2</i>    | <i>JunB</i>    | <i>Krtap15</i>   | <i>Mmp13</i>  | <i>Tgfb1</i>  |
| <i>Cdh3</i>   | <i>Gjb2</i>     | <i>Krt10</i>   | <i>Krtap16-7</i> | <i>Mmp15</i>  | <i>Tgm1</i>   |
| <i>Cldn23</i> | <i>Gjb3</i>     | <i>Krt12</i>   | <i>Krtap2-4</i>  | <i>Mmp1a</i>  | <i>Tgm3</i>   |
| <i>Cldnd1</i> | <i>Gjb4</i>     | <i>Krt13</i>   | <i>Krtap31-1</i> | <i>Mmp1b</i>  | <i>Timb1</i>  |
| <i>Cts8</i>   | <i>Gjb5</i>     | <i>Krt15</i>   | <i>Krtap4-13</i> | <i>Mmp3</i>   | <i>Tslp</i>   |
| <i>Ctsc</i>   | <i>Gjb6</i>     | <i>Krt16</i>   | <i>Krtap4-2</i>  | <i>Mmp7</i>   |               |
| <i>Ctss</i>   | <i>Hbegf</i>    | <i>Krt17</i>   | <i>Krtap5-2</i>  | <i>Mmp8</i>   |               |
| <i>Cx3cl1</i> | <i>Il133ra1</i> | <i>Krt18</i>   | <i>Krtap6-2</i>  | <i>Mmp9</i>   |               |
| <i>Cx3cr1</i> | <i>Il17a</i>    | <i>Krt19</i>   | <i>Krtap</i>     | <i>Prss8</i>  |               |
| <i>Cxcl10</i> | <i>Il17d</i>    | <i>Krt2</i>    | <i>Lce1a1</i>    | <i>S100a1</i> |               |
| <i>Cxcl11</i> | <i>Il18</i>     | <i>Krt20</i>   | <i>Lce1a2</i>    | <i>S100a2</i> |               |

**B**

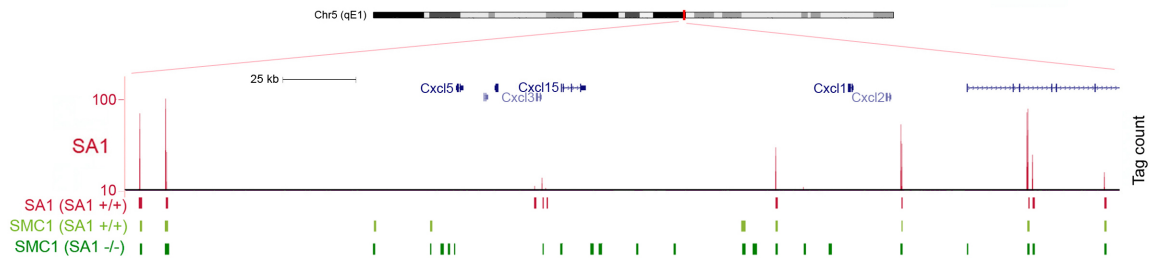

**Supplementary Table S1: ChIP-seq experiment summary.** Overall reads obtained in Illumina ChIP-seq experiments. Alignments on NCBI m37 genome assembly were made with Illumina's Eland software (GAPipeline 1.4.0), allowing no more than 2 mismatches within 36 base seed lengths.

| Sample         | Sequenced reads (QC PASS) | Uniquely aligned reads | % uniquely aligned | Duplicate Filtered Tags (Redundant) |
|----------------|---------------------------|------------------------|--------------------|-------------------------------------|
| Input 1        | 30,837,796                | 21,931,673             | 71                 | 21,298,545 (3%)                     |
| SA1 (SA1 +/+)  | 33,045,532                | 22,412,267             | 68                 | 21,383,266 (5%)                     |
| SA2 (SA1 +/+)  | 34,511,610                | 21,521,101             | 62                 | 19,456,228 (10%)                    |
| SA2 (SA1 -/-)  | 35,015,268                | 22,899,617             | 65                 | 21,850,166 (5%)                     |
| Input 2        | 38,619,369                | 26,929,896             | 70                 | 26,239,283 (3%)                     |
| SA1 (SA1 -/-)  | 35,702,433                | 20,126,016             | 56                 | 19,465,428 (3%)                     |
| SMC1 (SA1 +/+) | 34,490,522                | 21,948,219             | 64                 | 21,375,089 (3%)                     |
| SMC1 (SA1 -/-) | 39,771,621                | 21,088,100             | 53                 | 20,147,423 (4%)                     |
| SMC3 (SA1 +/+) | 38,659,833                | 24,690,999             | 64                 | 23,975,691 (3%)                     |
| SMC3 (SA1 -/-) | 37,835,948                | 26,563,680             | 70                 | 25,820,540 (3%)                     |

**Supplementary Table S2: ChIP-seq experiment, cleaning criteria.** Peaks from chromosome Y and Mitochondrial DNA have been discarded. Inputs have been used as control condition in all experiments. Any region enriched in inputs has been eliminated. SA1 signals from SA1<sup>-/-</sup> have been removed from SA1<sup>+/+</sup>.

| Sample                     | Regions/Peaks (FDR $\leq$ 10%) | Input cleaned | SA1 <sup>-/-</sup> cleaned | Double Enrichment |
|----------------------------|--------------------------------|---------------|----------------------------|-------------------|
| Input 1                    | 436                            | 0             |                            |                   |
| SA1 (SA1 <sup>+/+</sup> )  | 26,602                         | 26,600        | 26,594                     | 25,737            |
| SA2 (SA1 <sup>+/+</sup> )  | 7,741                          | 7,741         |                            |                   |
| SA2 (SA1 <sup>-/-</sup> )  | 6,352                          | 6,349         |                            |                   |
| Input 2                    | 417                            | 0             |                            |                   |
| SA1 (SA1 <sup>-/-</sup> )  | 177                            | 176           |                            |                   |
| SMC1 (SA1 <sup>+/+</sup> ) | 24,000                         | 23,994        |                            |                   |
| SMC1 (SA1 <sup>-/-</sup> ) | 47,003                         | 46,997        |                            |                   |
| SMC3 (SA1 <sup>+/+</sup> ) | 15,564                         | 15,562        |                            |                   |
| SMC3 (SA1 <sup>-/-</sup> ) | 34,802                         | 34,800        |                            |                   |

| Sample        | Regions/Peaks (FDR $\leq$ 10%) |
|---------------|--------------------------------|
| CTCF_MEL_YALE | 35,482                         |

**Supplementary Table S3: Dysregulated genes in SA1-null cells (p<0.01).**  
(Genes with FDR < 0.15 are shown in bold).

| <b>Gene Symbol</b> | <b>Accession Number</b> | <b>log<sub>2</sub>FC</b> | <b>p-value</b> |
|--------------------|-------------------------|--------------------------|----------------|
| <b>Lyz1</b>        | NM_013590               | 3.63                     | 2.13E-06       |
| <b>Marco</b>       | NM_010766               | 2.94                     | 6.81E-06       |
| <b>Arhgap30</b>    | NM_001005508            | 2.19                     | 1.38E-05       |
| <b>Lyz2</b>        | NM_017372               | 3.55                     | 1.43E-05       |
| <b>Stag1</b>       | NM_009282               | -3.56                    | 1.59E-05       |
| <b>Msr1</b>        | NM_031195               | 2.75                     | 1.81E-05       |
| <b>Tyrobp</b>      | NM_011662               | 3.13                     | 1.92E-05       |
| <b>Igsf6</b>       | NM_030691               | 2.60                     | 2.17E-05       |
| <b>Rapgef5</b>     | AK122234                | 1.99                     | 2.61E-05       |
| <b>Ms4a7</b>       | NM_001025610            | 3.08                     | 3.64E-05       |
| <b>Msr1</b>        | NM_031195               | 2.54                     | 3.70E-05       |
| <b>Casp1</b>       | NM_009807               | 2.19                     | 3.92E-05       |
| <b>AF251705</b>    | NM_134158               | 1.87                     | 4.05E-05       |
| <b>Lyz2</b>        | NM_017372               | 2.72                     | 4.43E-05       |
| <b>Mmp3</b>        | NM_010809               | 1.86                     | 4.89E-05       |
| <b>Ms4a7</b>       | NM_001025610            | 2.85                     | 5.41E-05       |
| <b>Hpgd</b>        | NM_008278               | 1.75                     | 5.43E-05       |
| <b>Fyb</b>         | NM_011815               | 2.78                     | 5.48E-05       |
| <b>Myo1f</b>       | NM_053214               | 2.12                     | 5.64E-05       |
| <b>Pilra</b>       | NM_153510               | 2.43                     | 5.69E-05       |
| <b>Lcp1</b>        | NM_008879               | 2.64                     | 5.88E-05       |
| <b>BC013712</b>    | AK137465                | 2.83                     | 6.21E-05       |
| <b>Ptprc</b>       | NM_011210               | 2.90                     | 6.24E-05       |
| <b>Ebi3</b>        | NM_015766               | 2.03                     | 6.42E-05       |
| <b>Cd14</b>        | NM_009841               | 1.91                     | 6.87E-05       |
| <b>Alox5ap</b>     | NM_009663               | 2.67                     | 7.05E-05       |
| <b>Lrrc25</b>      | NM_153074               | 2.45                     | 7.05E-05       |
| <b>Clec4n</b>      | NM_020001               | 3.43                     | 7.40E-05       |
| <b>Pilrb1</b>      | NM_133209               | 2.31                     | 7.55E-05       |
| <b>Ptprc</b>       | NM_011210               | 2.95                     | 8.24E-05       |
| <b>Ccl6</b>        | NM_009139               | 2.26                     | 8.41E-05       |
| <b>Dock10</b>      | XM_891407               | 1.43                     | 8.43E-05       |
| <b>Lair1</b>       | NM_178611               | 2.57                     | 8.58E-05       |
| <b>Fcer1g</b>      | J05020                  | 2.63                     | 8.74E-05       |
| <b>Tcfec</b>       | NM_031198               | 1.33                     | 9.14E-05       |
| <b>Itgal</b>       | AK156251                | 2.32                     | 9.16E-05       |
| <b>Arhgap30</b>    | NM_001005508            | 2.11                     | 9.62E-05       |
| <b>Stag1</b>       | NM_009282               | -2.19                    | 9.94E-05       |
| <b>Stag1</b>       | NM_009282               | -3.53                    | 1.01E-04       |
| <b>Ptprc</b>       | NM_011210               | 2.94                     | 1.02E-04       |
| <b>Clec5a</b>      | NM_001038604            | 3.31                     | 1.03E-04       |



|                 |              |       |          |
|-----------------|--------------|-------|----------|
| <b>Clec4a2</b>  | NM_011999    | 2.16  | 1.05E-04 |
| <b>Ptprc</b>    | NM_011210    | 2.81  | 1.07E-04 |
| <b>Ptprc</b>    | NM_011210    | 2.85  | 1.07E-04 |
| <b>Ptprc</b>    | NM_011210    | 2.95  | 1.10E-04 |
| <b>Ptprc</b>    | NM_011210    | 2.84  | 1.10E-04 |
| <b>Ncf4</b>     | NM_008677    | 3.15  | 1.11E-04 |
| <b>Tm6sf1</b>   | NM_145375    | 1.92  | 1.15E-04 |
| <b>Rinl</b>     | NM_177158    | 1.17  | 1.22E-04 |
| <b>Hk3</b>      | NM_001033245 | 1.32  | 1.24E-04 |
| <b>Rnd1</b>     | NM_172612    | 1.32  | 1.35E-04 |
| <b>Cxcl16</b>   | NM_023158    | 2.18  | 1.39E-04 |
| <b>Ptprc</b>    | NM_011210    | 2.89  | 1.43E-04 |
| <b>Tnf</b>      | NM_013693    | 1.20  | 1.45E-04 |
| <b>Hcls1</b>    | NM_008225    | 3.03  | 1.48E-04 |
| <b>Ms4a6d</b>   | AB026047     | 2.92  | 1.51E-04 |
| <b>Lrrc33</b>   | NM_146069    | 2.75  | 1.52E-04 |
| <b>Ptprc</b>    | NM_011210    | 2.91  | 1.52E-04 |
| <b>Acpl2</b>    | NM_153420    | -2.14 | 1.55E-04 |
| <b>AF251705</b> | NM_134158    | 2.82  | 1.56E-04 |
| <b>Bcl2a1b</b>  | NM_007534    | 2.98  | 1.58E-04 |
| <b>Ptprc</b>    | NM_011210    | 2.85  | 1.65E-04 |
| <b>Lrmp</b>     | NM_008511    | 1.76  | 1.81E-04 |
| <b>Lcp1</b>     | NM_008879    | 1.64  | 1.82E-04 |
| <b>Tnf</b>      | NM_013693    | 1.17  | 1.86E-04 |
| <b>Psmb9</b>    | NM_013585    | 1.34  | 1.86E-04 |
| <b>Rgs14</b>    | NM_016758    | 1.15  | 1.89E-04 |
| <b>Ptpn7</b>    | NM_177081    | 1.41  | 1.98E-04 |
| <b>Fcgr3</b>    | NM_010188    | 2.82  | 2.04E-04 |
| <b>Cd68</b>     | NM_009853    | 1.77  | 2.19E-04 |
| <b>Btk</b>      | NM_013482    | 1.48  | 2.23E-04 |
| <b>Lair1</b>    | NM_178611    | 1.69  | 2.25E-04 |
| <b>Oas1a</b>    | NM_145211    | 1.12  | 2.35E-04 |
| <b>Batf</b>     | NM_016767    | 1.03  | 2.36E-04 |
| <b>Zmynd15</b>  | NM_001029929 | 1.50  | 2.52E-04 |
| <b>Pycard</b>   | NM_023258    | 2.35  | 2.69E-04 |
| <b>Ptpro</b>    | NM_011216    | 1.78  | 2.90E-04 |
| <b>NA</b>       | TC1658525    | 2.09  | 3.06E-04 |
| <b>Msr1</b>     | NM_031195    | 2.58  | 3.10E-04 |
| <b>Cd84</b>     | NM_013489    | 1.81  | 3.11E-04 |
| <b>Cd200r1</b>  | NM_021325    | 0.96  | 3.13E-04 |
| <b>Plek</b>     | NM_019549    | 1.90  | 3.19E-04 |
| <b>Parvg</b>    | NM_022321    | 1.00  | 3.21E-04 |
| <b>Srgn</b>     | NM_011157    | 3.68  | 3.26E-04 |
| <b>Clec5a</b>   | NM_021364    | 1.35  | 3.26E-04 |
| <b>Neurl3</b>   | NM_153408    | 1.24  | 3.43E-04 |

|                      |              |       |          |
|----------------------|--------------|-------|----------|
| <i>Plek</i>          | NM_019549    | 2.16  | 3.50E-04 |
| <i>Al662270</i>      | AK028715     | 1.26  | 3.55E-04 |
| <i>P2ry6</i>         | NM_183168    | 2.50  | 3.63E-04 |
| <i>Bcl2a1c</i>       | NM_007535    | 1.81  | 3.88E-04 |
| <i>NA</i>            | XM_129176    | 2.62  | 3.96E-04 |
| <i>Samsn1</i>        | NM_023380    | 2.64  | 3.99E-04 |
| <i>Rapgef5</i>       | AK122234     | 1.68  | 4.00E-04 |
| <i>NA</i>            | A_51_P402908 | 2.28  | 4.04E-04 |
| <i>Cd86</i>          | NM_019388    | 0.88  | 4.05E-04 |
| <i>Btk</i>           | NM_013482    | 1.31  | 4.08E-04 |
| <i>Ncf2</i>          | NM_010877    | 2.50  | 4.18E-04 |
| <i>1810011H11Rik</i> | AK007434     | 2.73  | 4.26E-04 |
| <i>Cd72</i>          | AK144191     | 2.09  | 4.36E-04 |
| <i>Lpxn</i>          | NM_134152    | 2.19  | 4.45E-04 |
| <i>Arhgap25</i>      | NM_001037727 | 2.75  | 4.59E-04 |
| <i>Bst1</i>          | NM_009763    | 1.38  | 4.62E-04 |
| <i>Coro1a</i>        | NM_009898    | 2.87  | 4.84E-04 |
| <i>Stab1</i>         | NM_138672    | 2.77  | 4.88E-04 |
| <i>Trem1</i>         | NM_021406    | 1.24  | 4.92E-04 |
| <i>Tnf</i>           | NM_013693    | 1.35  | 5.00E-04 |
| <i>Dlk1</i>          | L12721       | -1.00 | 5.04E-04 |
| <i>Trem2</i>         | NM_031254    | 3.06  | 5.10E-04 |
| <i>Nckap1l</i>       | NM_153505    | 2.65  | 5.11E-04 |
| <i>Cd52</i>          | NM_013706    | 3.23  | 5.16E-04 |
| <i>Btk</i>           | NM_013482    | 1.39  | 5.34E-04 |
| <i>Cxcl16</i>        | NM_023158    | 1.88  | 5.40E-04 |
| <i>Trem2</i>         | NM_031254    | 2.24  | 5.58E-04 |
| <i>Oas1f</i>         | NM_145153    | 1.47  | 5.64E-04 |
| <i>Wdfy4</i>         | AK155186     | 2.66  | 5.66E-04 |
| <i>Psmb8</i>         | NM_010724    | 1.73  | 5.66E-04 |
| <i>Dennd1c</i>       | NM_153551    | 1.93  | 5.73E-04 |
| <i>Lpxn</i>          | NM_134152    | 2.09  | 5.79E-04 |
| <i>Snx20</i>         | NM_027840    | 2.37  | 5.82E-04 |
| <i>Tnf</i>           | NM_013693    | 1.35  | 5.84E-04 |
| <i>B3galt5</i>       | NM_033149    | 1.90  | 5.85E-04 |
| <i>Slc7a8</i>        | NM_016972    | 2.79  | 5.93E-04 |
| <i>Itgal</i>         | NM_008400    | 0.84  | 5.98E-04 |
| <i>Tnf</i>           | NM_013693    | 1.37  | 6.05E-04 |
| <i>Tm6sf1</i>        | NM_145375    | 2.18  | 6.08E-04 |
| <i>Adra2a</i>        | NM_007417    | -0.95 | 6.09E-04 |
| <i>Pilra</i>         | AK041670     | 0.88  | 6.10E-04 |
| <i>Ap1s3</i>         | NM_183027    | 0.84  | 6.12E-04 |
| <i>Slc15a3</i>       | NM_023044    | 2.15  | 6.26E-04 |
| <i>Ptpn6</i>         | NM_001077705 | 2.66  | 6.29E-04 |
| <i>Pik3r5</i>        | NM_177320    | 1.19  | 6.30E-04 |

|                |              |       |          |
|----------------|--------------|-------|----------|
| <i>Rcsd1</i>   | NM_178593    | 1.67  | 6.34E-04 |
| <i>Tnf</i>     | NM_013693    | 1.26  | 6.40E-04 |
| <i>Slc5a7</i>  | NM_022025    | -1.21 | 6.42E-04 |
| <i>Hhex</i>    | NM_008245    | 2.09  | 6.48E-04 |
| <i>Epsti1</i>  | NM_029495    | 0.78  | 6.51E-04 |
| <i>Lat2</i>    | NM_020044    | 2.12  | 6.51E-04 |
| <i>Egr3</i>    | AK141603     | -1.15 | 6.54E-04 |
| <i>Fcgr3</i>   | NM_010188    | 3.03  | 6.61E-04 |
| <i>C5ar1</i>   | NM_007577    | 0.74  | 6.82E-04 |
| <i>Tnf</i>     | NM_013693    | 1.34  | 6.85E-04 |
| <i>Rac2</i>    | NM_009008    | 2.86  | 6.88E-04 |
| <i>Ms4a6d</i>  | NM_026835    | 2.93  | 6.98E-04 |
| <i>Tnf</i>     | NM_013693    | 1.19  | 7.03E-04 |
| <i>Hpgd</i>    | NM_008278    | 1.88  | 7.03E-04 |
| <i>Hpgds</i>   | NM_019455    | 1.32  | 7.08E-04 |
| <i>Sp110</i>   | NM_175397    | 2.68  | 7.09E-04 |
| <i>Eps8</i>    | NM_007945    | -1.17 | 7.13E-04 |
| <i>Gm10345</i> | AK005822     | 1.47  | 7.16E-04 |
| <i>Psmb8</i>   | NM_010724    | 1.50  | 7.20E-04 |
| <i>Slc39a4</i> | NM_028064    | 1.31  | 7.29E-04 |
| <i>Btk</i>     | NM_013482    | 1.39  | 7.37E-04 |
| <i>Plscr2</i>  | NM_008880    | 1.24  | 7.63E-04 |
| <i>Cd72</i>    | NM_007654    | 1.96  | 7.65E-04 |
| <i>Btk</i>     | NM_013482    | 1.43  | 7.70E-04 |
| <i>Tnf</i>     | NM_013693    | 1.28  | 7.71E-04 |
| <i>Creg2</i>   | NM_170597    | 0.88  | 7.74E-04 |
| <i>Rab3il1</i> | BC020147     | 1.13  | 7.80E-04 |
| <i>Fcgr2b</i>  | NM_001077189 | 3.89  | 7.94E-04 |
| <i>Spon2</i>   | NM_133903    | -1.20 | 8.11E-04 |
| <i>Btk</i>     | NM_013482    | 1.29  | 8.22E-04 |
| <i>Fcgr2b</i>  | NM_001077189 | 3.72  | 8.28E-04 |
| <i>Vegfc</i>   | NM_009506    | 0.73  | 8.42E-04 |
| <i>Fcer1g</i>  | NM_010185    | 2.70  | 8.51E-04 |
| <i>Lst1</i>    | AF000427     | 1.74  | 8.58E-04 |
| <i>Arhgap9</i> | NM_146011    | 1.15  | 8.60E-04 |
| <i>Tal1</i>    | NM_011527    | 1.73  | 8.82E-04 |
| <i>Ly6a</i>    | NM_010738    | -1.75 | 8.84E-04 |
| <i>Mdk</i>     | NM_010784    | -0.86 | 8.85E-04 |
| <i>Ctss</i>    | NM_021281    | 4.15  | 8.89E-04 |
| <i>Evi2a</i>   | NM_001033711 | 1.58  | 8.89E-04 |
| <i>Il6</i>     | NM_031168    | 0.96  | 9.13E-04 |
| <i>Fcgr2b</i>  | NM_001077189 | 3.77  | 9.19E-04 |
| <i>Pycard</i>  | NM_023258    | 1.81  | 9.24E-04 |
| <i>Trim30</i>  | NM_009099    | 1.33  | 9.37E-04 |
| <i>Ms4a6c</i>  | NM_028595    | 2.39  | 9.38E-04 |

|                      |              |       |          |
|----------------------|--------------|-------|----------|
| <i>Ptpn18</i>        | U52523       | 3.11  | 9.56E-04 |
| <i>Tnni2</i>         | NM_009405    | 0.91  | 9.62E-04 |
| <i>Pdgfra</i>        | NM_011058    | -0.91 | 9.77E-04 |
| <i>C1qc</i>          | NM_007574    | 2.87  | 9.79E-04 |
| <i>Myo1g</i>         | NM_178440    | 2.41  | 9.90E-04 |
| <i>Slc11a1</i>       | NM_013612    | 2.32  | 1.01E-03 |
| <i>Csf2ra</i>        | NM_009970    | 1.42  | 1.05E-03 |
| <i>Plscr2</i>        | NM_008880    | 0.97  | 1.05E-03 |
| <i>Ifi2712a</i>      | AK010014     | 1.19  | 1.05E-03 |
| <i>Fcgr2b</i>        | NM_001077189 | 3.59  | 1.05E-03 |
| <i>Fcgr2b</i>        | NM_001077189 | 3.89  | 1.07E-03 |
| <i>Tnf</i>           | NM_013693    | 1.32  | 1.07E-03 |
| <i>Hfe</i>           | NM_010424    | 0.64  | 1.07E-03 |
| <i>Cfp</i>           | NM_008823    | 2.62  | 1.08E-03 |
| <i>Btk</i>           | NM_013482    | 1.32  | 1.08E-03 |
| <i>Pdgfra</i>        | NM_011058    | -0.92 | 1.09E-03 |
| <i>Traf3ip3</i>      | NM_153137    | 1.14  | 1.10E-03 |
| <i>Rhbdf2</i>        | NM_172572    | 1.21  | 1.12E-03 |
| <i>Btk</i>           | NM_013482    | 1.44  | 1.13E-03 |
| <i>Gpr65</i>         | NM_008152    | 2.82  | 1.13E-03 |
| <i>Sned1</i>         | NM_172463    | -1.23 | 1.13E-03 |
| <i>Fermt3</i>        | NM_153795    | 1.89  | 1.14E-03 |
| <i>Zfp386</i>        | AK220544     | -1.17 | 1.15E-03 |
| <i>Ccdc88b</i>       | BC038890     | 2.64  | 1.15E-03 |
| <i>Arap3</i>         | NM_139206    | 2.26  | 1.16E-03 |
| <i>Fcgr2b</i>        | NM_001077189 | 3.80  | 1.17E-03 |
| <i>Rgs17</i>         | NM_019958    | -1.01 | 1.21E-03 |
| <i>C130050O18Rik</i> | NM_177000    | 1.52  | 1.22E-03 |
| <i>Fyb</i>           | NM_011815    | 1.31  | 1.22E-03 |
| <i>Vav1</i>          | NM_011691    | 2.34  | 1.22E-03 |
| <i>Sox11</i>         | AK004158     | 1.11  | 1.22E-03 |
| <i>Nufip2</i>        | NM_001024205 | -0.76 | 1.24E-03 |
| <i>Fam78a</i>        | NM_175511    | 1.32  | 1.25E-03 |
| <i>Parp14</i>        | NM_001039530 | 1.56  | 1.27E-03 |
| <i>Akap5</i>         | AK014386     | 1.18  | 1.29E-03 |
| <i>Fcgr2b</i>        | NM_001077189 | 3.79  | 1.29E-03 |
| <i>Vldlr</i>         | AK036010     | -0.64 | 1.29E-03 |
| <i>Adam8</i>         | NM_007403    | 2.39  | 1.30E-03 |
| <i>Fcgr1</i>         | NM_010186    | 3.06  | 1.30E-03 |
| <i>Efs</i>           | NM_010112    | -0.80 | 1.31E-03 |
| <i>Acot2</i>         | NM_134188    | -0.80 | 1.32E-03 |
| <i>Eps8</i>          | NM_007945    | -0.89 | 1.36E-03 |
| <i>Fcgr2b</i>        | NM_001077189 | 3.71  | 1.37E-03 |
| <i>Cyth1</i>         | NM_011180    | 0.66  | 1.37E-03 |
| <i>Amot</i>          | AK129277     | 0.71  | 1.38E-03 |



|                      |              |       |          |
|----------------------|--------------|-------|----------|
| <i>Trpv2</i>         | NM_011706    | 0.71  | 1.38E-03 |
| <i>Pkib</i>          | NM_001039050 | 1.15  | 1.39E-03 |
| <i>Aif1</i>          | NM_019467    | 2.98  | 1.39E-03 |
| <i>5430427O19Rik</i> | AK155591     | 1.50  | 1.46E-03 |
| <i>D1Ert622e</i>     | NM_133825    | 0.71  | 1.49E-03 |
| <i>St8sia4</i>       | NM_009183    | 1.50  | 1.50E-03 |
| <i>Sox11</i>         | AK004158     | 1.24  | 1.52E-03 |
| <i>Btk</i>           | NM_013482    | 1.28  | 1.52E-03 |
| <i>Fcgr2b</i>        | NM_001077189 | 3.71  | 1.52E-03 |
| <i>Pcdh21</i>        | NM_130878    | -0.71 | 1.53E-03 |
| <i>Efemp1</i>        | NM_146015    | -2.20 | 1.54E-03 |
| <i>Sh3tc1</i>        | NM_194344    | 1.33  | 1.56E-03 |
| <i>Cables1</i>       | NM_022021    | 0.75  | 1.57E-03 |
| <i>Pdgfra</i>        | NM_011058    | -0.93 | 1.57E-03 |
| <i>Clec4d</i>        | NM_010819    | 2.97  | 1.59E-03 |
| <i>Nrn1</i>          | NM_153529    | -1.64 | 1.59E-03 |
| <i>Trem1</i>         | NM_021406    | 0.97  | 1.59E-03 |
| <i>Gpbp1l1</i>       | AK139506     | 0.83  | 1.60E-03 |
| <i>Ces1</i>          | NM_021456    | 1.16  | 1.64E-03 |
| <i>Pilrb2</i>        | NM_001024932 | 1.15  | 1.65E-03 |
| <i>Emr1</i>          | NM_010130    | 0.61  | 1.66E-03 |
| <i>NA</i>            | TC1655572    | -0.72 | 1.66E-03 |
| <i>Trpv4</i>         | NM_022017    | -1.21 | 1.68E-03 |
| <i>Apobec1</i>       | NM_031159    | 1.86  | 1.68E-03 |
| <i>Sirpa</i>         | NM_007547    | 1.73  | 1.71E-03 |
| <i>Sirpb1</i>        | NM_178792    | 1.11  | 1.71E-03 |
| <i>Adarb1</i>        | NM_001024840 | 0.76  | 1.72E-03 |
| <i>Ecm1</i>          | NM_007899    | -1.18 | 1.72E-03 |
| <i>Ifi27l2a</i>      | NM_029803    | 1.21  | 1.74E-03 |
| <i>Col4a4</i>        | NM_007735    | -0.72 | 1.74E-03 |
| <i>Fcgr2b</i>        | NM_001077189 | 3.18  | 1.76E-03 |
| <i>Il6</i>           | NM_031168    | 1.02  | 1.76E-03 |
| <i>6430548M08Rik</i> | AK133157     | 0.57  | 1.77E-03 |
| <i>Fcgr2b</i>        | NM_001077189 | 3.66  | 1.77E-03 |
| <i>Emr1</i>          | NM_010130    | 3.13  | 1.78E-03 |
| <i>Ambp</i>          | NM_007443    | 1.48  | 1.80E-03 |
| <i>Clec4a2</i>       | NM_011999    | 1.19  | 1.82E-03 |
| <i>Synpo</i>         | AK034012     | -0.81 | 1.83E-03 |
| <i>Hdac9</i>         | NM_024124    | 0.69  | 1.83E-03 |
| <i>Arl15</i>         | NM_172595    | -0.66 | 1.83E-03 |
| <i>Il6</i>           | NM_031168    | 0.97  | 1.84E-03 |
| <i>Il6</i>           | NM_031168    | 1.04  | 1.84E-03 |
| <i>Ms4a6b</i>        | NM_027209    | 3.81  | 1.85E-03 |
| <i>Mri1</i>          | NM_026423    | -0.65 | 1.90E-03 |
| <i>Rhoh</i>          | BC094937     | 1.21  | 1.90E-03 |

|                      |              |       |          |
|----------------------|--------------|-------|----------|
| <i>H2afj</i>         | NM_177688    | 0.56  | 1.90E-03 |
| <i>Sp100</i>         | BC069183     | 0.57  | 1.94E-03 |
| <i>Rnd1</i>          | AK039992     | 0.64  | 1.98E-03 |
| <i>Clec4b1</i>       | NM_027218    | 1.67  | 1.98E-03 |
| <i>Was</i>           | NM_009515    | 1.94  | 1.98E-03 |
| <i>Kctd8</i>         | NM_175519    | -0.76 | 2.00E-03 |
| <i>ldh3a</i>         | NM_029573    | 0.55  | 2.01E-03 |
| <i>Gpr84</i>         | NM_030720    | 3.06  | 2.02E-03 |
| <i>Glpr1</i>         | NM_028608    | 1.31  | 2.03E-03 |
| <i>Tcea3</i>         | NM_011542    | -0.88 | 2.03E-03 |
| <i>Laptm5</i>        | NM_010686    | 1.45  | 2.04E-03 |
| <i>Acpl2</i>         | NM_153420    | -0.60 | 2.04E-03 |
| <i>Vav1</i>          | NM_011691    | 2.13  | 2.05E-03 |
| <i>Tnfsf11</i>       | NM_011613    | -0.63 | 2.05E-03 |
| <i>Plcg2</i>         | NM_172285    | 1.77  | 2.06E-03 |
| <i>Vcan</i>          | D28599       | -0.79 | 2.07E-03 |
| <i>Ccl2</i>          | NM_011333    | 1.22  | 2.07E-03 |
| NA                   | TC1717239    | 0.55  | 2.08E-03 |
| <i>6330442E10Rik</i> | NM_178745    | 1.16  | 2.10E-03 |
| <i>Pdlim4</i>        | NM_019417    | 0.80  | 2.12E-03 |
| <i>Fcgr2b</i>        | NM_010187    | 3.06  | 2.12E-03 |
| <i>Pdgfra</i>        | NM_011058    | -0.95 | 2.13E-03 |
| <i>Mgll</i>          | NM_011844    | 1.06  | 2.14E-03 |
| <i>Pdgfra</i>        | NM_011058    | -0.93 | 2.15E-03 |
| <i>Fgl1</i>          | AK083397     | 0.63  | 2.15E-03 |
| <i>Ccl2</i>          | NM_011333    | 1.18  | 2.16E-03 |
| <i>Rnd1</i>          | BC048531     | 0.53  | 2.18E-03 |
| <i>Dcaf12l2</i>      | NM_175539    | 0.71  | 2.18E-03 |
| NA                   | NM_001045537 | 0.53  | 2.21E-03 |
| <i>Tmem206</i>       | NM_025864    | 0.90  | 2.21E-03 |
| <i>Cobl</i>          | NM_172496    | 0.94  | 2.22E-03 |
| NA                   | NAP037326-1  | 2.14  | 2.23E-03 |
| <i>Pdgfra</i>        | NM_011058    | -0.91 | 2.24E-03 |
| <i>Ccl2</i>          | NM_011333    | 1.23  | 2.24E-03 |
| <i>Ccl2</i>          | NM_011333    | 1.16  | 2.27E-03 |
| <i>Trerf1</i>        | NM_172622    | -0.74 | 2.28E-03 |
| <i>Mri1</i>          | NM_026423    | -0.78 | 2.28E-03 |
| <i>Cd53</i>          | NM_007651    | 1.97  | 2.29E-03 |
| <i>Csf2rb</i>        | AK154286     | 2.66  | 2.29E-03 |
| <i>Mgat4a</i>        | NM_173870    | 0.68  | 2.31E-03 |
| <i>Chmp4b</i>        | NM_029362    | -0.75 | 2.31E-03 |
| <i>Blnk</i>          | NM_008528    | 2.69  | 2.31E-03 |
| <i>Csf1r</i>         | NM_001037859 | 2.87  | 2.32E-03 |
| <i>Col15a1</i>       | NM_009928    | -0.81 | 2.33E-03 |
| <i>Ccl2</i>          | NM_011333    | 1.21  | 2.34E-03 |

|                  |           |       |          |
|------------------|-----------|-------|----------|
| <i>Lat2</i>      | NM_020044 | 0.86  | 2.34E-03 |
| <i>Lonrf3</i>    | NM_028894 | 1.44  | 2.34E-03 |
| <i>Cnn1</i>      | NM_009922 | 0.65  | 2.34E-03 |
| NA               | TC1709674 | 0.53  | 2.37E-03 |
| <i>C1qa</i>      | NM_007572 | 2.84  | 2.40E-03 |
| <i>Raet1e</i>    | NM_198193 | -1.10 | 2.41E-03 |
| <i>Il6</i>       | NM_031168 | 0.86  | 2.43E-03 |
| <i>Il6</i>       | NM_031168 | 0.85  | 2.44E-03 |
| <i>Sncg</i>      | NM_011430 | -0.95 | 2.45E-03 |
| <i>Il6</i>       | NM_031168 | 0.98  | 2.46E-03 |
| <i>Tnfaip8l2</i> | NM_027206 | 1.81  | 2.47E-03 |
| <i>H1f0</i>      | NM_008197 | -0.53 | 2.47E-03 |
| <i>Pdgfra</i>    | NM_011058 | -0.83 | 2.50E-03 |
| <i>Cd48</i>      | NM_007649 | 1.38  | 2.50E-03 |
| <i>Ccl2</i>      | NM_011333 | 1.23  | 2.53E-03 |
| <i>Igf1</i>      | NM_010512 | 1.59  | 2.53E-03 |
| <i>Fam105a</i>   | NM_198301 | 1.45  | 2.55E-03 |
| <i>Clec4e</i>    | NM_019948 | 1.81  | 2.55E-03 |
| NA               | XM_203796 | 0.52  | 2.55E-03 |
| <i>Pdgfra</i>    | NM_011058 | -0.88 | 2.57E-03 |
| <i>Ccl2</i>      | NM_011333 | 1.22  | 2.59E-03 |
| <i>Irf8</i>      | NM_008320 | 2.63  | 2.62E-03 |
| <i>Coro1a</i>    | NM_009898 | 2.36  | 2.62E-03 |
| <i>Arhgap4</i>   | NM_138630 | 2.12  | 2.64E-03 |
| <i>Sfpi1</i>     | NM_011355 | 0.94  | 2.65E-03 |
| <i>H2-DMb1</i>   | NM_010387 | 0.71  | 2.65E-03 |
| <i>Bmp2k</i>     | NM_080708 | 1.21  | 2.65E-03 |
| <i>Rab20</i>     | NM_011227 | 0.60  | 2.69E-03 |
| <i>Ly6c2</i>     | D86232    | -1.81 | 2.70E-03 |
| <i>Ccl2</i>      | NM_011333 | 1.21  | 2.71E-03 |
| <i>Ifi27l2a</i>  | NM_029803 | 0.78  | 2.71E-03 |
| <i>Tlr1</i>      | NM_030682 | 0.96  | 2.74E-03 |
| <i>Crct1</i>     | NM_028798 | 0.72  | 2.74E-03 |
| <i>Plxnc1</i>    | AK011113  | 0.92  | 2.74E-03 |
| <i>Mafb</i>      | NM_010658 | 1.89  | 2.75E-03 |
| <i>Igf1</i>      | NM_010512 | 1.61  | 2.76E-03 |
| <i>Sirpb1</i>    | AK054545  | 2.15  | 2.76E-03 |
| <i>Cysltr1</i>   | NM_021476 | 1.09  | 2.76E-03 |
| <i>Inpp5d</i>    | NM_010566 | 2.97  | 2.77E-03 |
| <i>Ppap2b</i>    | NM_080555 | -1.14 | 2.79E-03 |
| <i>Wisp2</i>     | NM_016873 | -1.41 | 2.82E-03 |
| <i>Brwd2</i>     | NM_172255 | -0.66 | 2.83E-03 |
| <i>Wnk4</i>      | NM_175638 | -0.51 | 2.84E-03 |
| <i>Ebf2</i>      | NM_010095 | -0.95 | 2.89E-03 |
| <i>Ncf1</i>      | NM_010876 | 1.38  | 2.90E-03 |

|                      |              |       |          |
|----------------------|--------------|-------|----------|
| <i>Epb4.1l1</i>      | NM_001003815 | -0.54 | 2.92E-03 |
| <i>NA</i>            | A_52_P517668 | 0.63  | 2.94E-03 |
| <i>Tceal1</i>        | NM_146236    | -0.52 | 2.95E-03 |
| <i>Ugdh</i>          | NM_009466    | -0.95 | 2.96E-03 |
| <i>Tgm2</i>          | NM_009373    | 1.15  | 2.98E-03 |
| <i>Cyth4</i>         | NM_028195    | 1.93  | 2.99E-03 |
| <i>Rac2</i>          | NM_009008    | 2.14  | 3.03E-03 |
| <i>Klra7</i>         | NM_014194    | 0.70  | 3.06E-03 |
| <i>Pdgfra</i>        | NM_011058    | -0.88 | 3.09E-03 |
| <i>Adra2a</i>        | NM_007417    | -0.82 | 3.10E-03 |
| <i>Rcor3</i>         | AK135612     | -0.63 | 3.13E-03 |
| <i>Mtap1a</i>        | AK018185     | -0.66 | 3.13E-03 |
| <i>NA</i>            | NM_001033187 | -0.63 | 3.14E-03 |
| <i>Cd83</i>          | NM_009856    | 1.29  | 3.14E-03 |
| <i>Plxna2</i>        | NM_008882    | -0.66 | 3.18E-03 |
| <i>Cd55</i>          | AK030285     | -0.63 | 3.18E-03 |
| <i>D630045M09Rik</i> | AK131952     | 0.55  | 3.18E-03 |
| <i>Dnajc10</i>       | NM_024181    | -0.52 | 3.18E-03 |
| <i>Trem1</i>         | NM_027763    | 0.88  | 3.21E-03 |
| <i>Ccl2</i>          | NM_011333    | 1.25  | 3.24E-03 |
| <i>NA</i>            | AK013239     | 0.64  | 3.26E-03 |
| <i>Luc7l2</i>        | NM_138680    | 0.48  | 3.29E-03 |
| <i>Unc93b1</i>       | NM_019449    | 1.69  | 3.33E-03 |
| <i>Lst1</i>          | NM_010734    | 0.51  | 3.34E-03 |
| <i>Cd300lf</i>       | AF251703     | 0.48  | 3.35E-03 |
| <i>Gmfg</i>          | NM_022024    | 2.65  | 3.35E-03 |
| <i>Ank3</i>          | NM_146005    | -0.76 | 3.35E-03 |
| <i>Igf1</i>          | NM_010512    | 1.57  | 3.35E-03 |
| <i>Itgb2</i>         | NM_008404    | 1.81  | 3.36E-03 |
| <i>Icam1</i>         | BC008626     | 1.91  | 3.37E-03 |
| <i>Lilrb3</i>        | NM_011095    | 2.52  | 3.39E-03 |
| <i>Nfam1</i>         | NM_028728    | 1.25  | 3.39E-03 |
| <i>Lmo4</i>          | NM_010723    | -0.70 | 3.40E-03 |
| <i>Dok3</i>          | NM_013739    | 1.55  | 3.40E-03 |
| <i>Ces1</i>          | NM_021456    | 0.60  | 3.41E-03 |
| <i>Cox6a2</i>        | NM_009943    | -0.59 | 3.43E-03 |
| <i>Il6</i>           | NM_031168    | 0.91  | 3.45E-03 |
| <i>Cd200r1</i>       | NM_021325    | 0.56  | 3.45E-03 |
| <i>Rab3il1</i>       | BC020147     | 1.16  | 3.45E-03 |
| <i>Madd</i>          | NM_145527    | 1.09  | 3.46E-03 |
| <i>Ptma</i>          | NM_008972    | 0.51  | 3.47E-03 |
| <i>Siglec5</i>       | NM_145581    | 0.77  | 3.48E-03 |
| <i>Sox11</i>         | NM_009234    | 0.62  | 3.49E-03 |
| <i>Igf1</i>          | NM_010512    | 1.59  | 3.50E-03 |
| <i>Gpt2</i>          | NM_173866    | -0.78 | 3.50E-03 |



|                      |              |       |          |
|----------------------|--------------|-------|----------|
| NA                   | NAP071060-1  | -0.64 | 3.50E-03 |
| <i>Rhbdf2</i>        | NM_172572    | 0.89  | 3.51E-03 |
| <i>Alox5</i>         | NM_009662    | 2.57  | 3.51E-03 |
| <i>Igf1</i>          | NM_010512    | 1.56  | 3.54E-03 |
| <i>Igf1</i>          | NM_184052    | 1.47  | 3.55E-03 |
| <i>Pdgfra</i>        | NM_011058    | -0.88 | 3.57E-03 |
| <i>Igf1</i>          | NM_010512    | 1.59  | 3.58E-03 |
| <i>Nfatc4</i>        | NM_023699    | -0.68 | 3.58E-03 |
| <i>C1qb</i>          | NM_009777    | 2.70  | 3.59E-03 |
| <i>Igfbp6</i>        | NM_008344    | -0.72 | 3.59E-03 |
| <i>Atf5</i>          | NM_030693    | -1.03 | 3.62E-03 |
| <i>LOC675366</i>     | XM_981337    | 0.52  | 3.63E-03 |
| <i>Icam1</i>         | BC008626     | 1.95  | 3.63E-03 |
| <i>Gm7120</i>        | NM_001039244 | -0.79 | 3.64E-03 |
| <i>Ly6c1</i>         | NM_010741    | -1.49 | 3.65E-03 |
| <i>Ptprj</i>         | NM_008982    | 0.51  | 3.69E-03 |
| <i>Tpbp</i>          | AK050794     | -0.75 | 3.74E-03 |
| <i>Aatk</i>          | NM_007377    | 1.64  | 3.75E-03 |
| <i>Col16a1</i>       | NM_028266    | -0.76 | 3.76E-03 |
| NA                   | XM_884305    | -0.53 | 3.77E-03 |
| <i>Tcta</i>          | NM_133986    | -0.51 | 3.80E-03 |
| <i>Scrn3</i>         | NM_029022    | -0.48 | 3.83E-03 |
| <i>Btk</i>           | NM_013482    | 1.18  | 3.84E-03 |
| <i>Icam1</i>         | BC008626     | 1.92  | 3.84E-03 |
| <i>Adamts15</i>      | AK154947     | -0.52 | 3.85E-03 |
| <i>Hoxd8</i>         | NM_008276    | -0.79 | 3.86E-03 |
| <i>Tnfrsf25</i>      | NM_009396    | -1.15 | 3.86E-03 |
| <i>Fgd3</i>          | NM_015759    | 0.59  | 3.90E-03 |
| <i>Icam1</i>         | BC008626     | 1.94  | 3.90E-03 |
| <i>Lrrcc1</i>        | NM_028915    | -0.50 | 3.91E-03 |
| <i>Rtkn</i>          | NM_133641    | -0.47 | 3.91E-03 |
| <i>9030409G11Rik</i> | BC022941     | 0.61  | 3.93E-03 |
| <i>Fam20a</i>        | NM_153782    | -0.72 | 4.00E-03 |
| <i>Pdgfrb</i>        | NM_008809    | -0.86 | 4.02E-03 |
| <i>Dach2</i>         | NM_033605    | -0.51 | 4.02E-03 |
| <i>Klhl9</i>         | NM_172871    | -0.51 | 4.02E-03 |
| <i>Csf1r</i>         | NM_001037859 | 1.85  | 4.03E-03 |
| <i>Slc30a1</i>       | NM_009579    | 0.53  | 4.04E-03 |
| <i>Lmo2</i>          | NM_008505    | 1.17  | 4.12E-03 |
| <i>Mpped2</i>        | AK165186     | -0.59 | 4.12E-03 |
| <i>Icam1</i>         | BC008626     | 1.93  | 4.13E-03 |
| <i>Sec23a</i>        | NM_009147    | -0.64 | 4.13E-03 |
| <i>Icam1</i>         | BC008626     | 1.91  | 4.18E-03 |
| <i>Tubb3</i>         | NM_023279    | -0.55 | 4.19E-03 |
| <i>Apobec3</i>       | AK049998     | 0.52  | 4.20E-03 |

|                      |              |       |          |
|----------------------|--------------|-------|----------|
| <i>Ripk4</i>         | NM_023663    | 0.51  | 4.23E-03 |
| <i>Bicd2</i>         | NM_001039179 | 0.50  | 4.24E-03 |
| <i>Snca</i>          | NM_001042451 | 0.93  | 4.24E-03 |
| <i>Naip2</i>         | NM_010872    | 1.75  | 4.25E-03 |
| <i>Icam1</i>         | BC008626     | 1.92  | 4.30E-03 |
| <i>Dip2c</i>         | BC089303     | -0.45 | 4.40E-03 |
| <i>Stmn4</i>         | NM_019675    | 1.17  | 4.40E-03 |
| <i>Igf1</i>          | NM_010512    | 1.59  | 4.42E-03 |
| <i>Tmem171</i>       | NM_001025606 | 0.68  | 4.43E-03 |
| <i>Pf4</i>           | NM_019932    | 3.58  | 4.46E-03 |
| <i>Slc1a4</i>        | NM_018861    | -0.80 | 4.46E-03 |
| <i>Tifa</i>          | NM_145133    | 0.66  | 4.48E-03 |
| <i>6720458D17Rik</i> | AK032822     | 0.56  | 4.49E-03 |
| <i>Igf1</i>          | NM_010512    | 1.61  | 4.52E-03 |
| <i>Icam1</i>         | BC008626     | 2.02  | 4.52E-03 |
| <i>Ccl2</i>          | NM_011333    | 1.23  | 4.53E-03 |
| <i>Abhd14b</i>       | NM_029631    | -0.59 | 4.53E-03 |
| <i>Ptprb</i>         | NM_029928    | -0.59 | 4.54E-03 |
| <i>Hoxc6</i>         | X16511       | -0.49 | 4.55E-03 |
| <i>Nfic</i>          | NM_008688    | -0.49 | 4.63E-03 |
| <i>Klra15</i>        | NM_013793    | 1.17  | 4.64E-03 |
| <i>Cxcr7</i>         | NM_007722    | -0.95 | 4.64E-03 |
| <i>Fhl1</i>          | NM_001077361 | 1.36  | 4.66E-03 |
| <i>Fam123a</i>       | NM_028113    | 0.79  | 4.69E-03 |
| <i>Gjb5</i>          | NM_010291    | -0.95 | 4.70E-03 |
| <i>Lilrb3</i>        | NM_011095    | 2.45  | 4.72E-03 |
| <i>Igf1</i>          | NM_010512    | 1.54  | 4.72E-03 |
| <i>Shoc2</i>         | NM_019658    | -0.51 | 4.73E-03 |
| <i>Icam1</i>         | BC008626     | 1.95  | 4.73E-03 |
| <i>Ncf1</i>          | NM_010876    | 1.82  | 4.74E-03 |
| <i>Il10ra</i>        | NM_008348    | 2.19  | 4.74E-03 |
| <i>Cnr2</i>          | NM_009924    | 1.09  | 4.74E-03 |
| <i>Pop4</i>          | NM_025390    | 0.61  | 4.76E-03 |
| <i>Cd86</i>          | NM_019388    | 0.91  | 4.79E-03 |
| <i>NA</i>            | XM_001002437 | -0.63 | 4.81E-03 |
| <i>Rab3il1</i>       | NM_144538    | 0.72  | 4.82E-03 |
| <i>Lyl1</i>          | NM_008535    | 2.93  | 4.82E-03 |
| <i>B3gnt8</i>        | NM_146184    | 0.61  | 4.82E-03 |
| <i>Mpped2</i>        | AK165186     | -0.50 | 4.83E-03 |
| <i>NA</i>            | TC1618787    | -0.54 | 4.85E-03 |
| <i>Cd55</i>          | NM_010016    | -0.81 | 4.86E-03 |
| <i>H2-K1</i>         | AK150790     | 0.68  | 4.92E-03 |
| <i>March1</i>        | NM_175188    | 2.11  | 4.96E-03 |
| <i>NA</i>            | NM_207269    | 1.45  | 4.97E-03 |
| <i>Il6</i>           | NM_031168    | 0.92  | 4.97E-03 |

|                      |                        |       |          |
|----------------------|------------------------|-------|----------|
| <i>Plxna2</i>        | NM_008882              | -0.80 | 4.99E-03 |
| <i>NA</i>            | XM_131643              | -0.45 | 4.99E-03 |
| <i>Zfp354c</i>       | NM_013922              | -0.42 | 5.03E-03 |
| <i>Gmfg</i>          | NM_022024              | 2.16  | 5.05E-03 |
| <i>Cxcl10</i>        | NM_021274              | 1.51  | 5.05E-03 |
| <i>Trim23</i>        | NM_030731              | -0.56 | 5.06E-03 |
| <i>NA</i>            | XM_983705              | 0.78  | 5.08E-03 |
| <i>Dock2</i>         | NM_033374              | 1.14  | 5.10E-03 |
| <i>Ceacam1</i>       | NM_001039185           | 0.91  | 5.11E-03 |
| <i>Zfp39</i>         | NM_011758              | -0.47 | 5.12E-03 |
| <i>Icam1</i>         | BC008626               | 1.94  | 5.15E-03 |
| <i>Spon2</i>         | NM_133903              | -1.54 | 5.18E-03 |
| <i>Snx2</i>          | NM_026386              | 0.42  | 5.19E-03 |
| <i>Il6</i>           | NM_031168              | 0.99  | 5.21E-03 |
| <i>Il1b</i>          | NM_008361              | 2.31  | 5.22E-03 |
| <i>Vps53</i>         | AK009586               | 0.72  | 5.25E-03 |
| <i>Eid1</i>          | NM_025613              | -0.41 | 5.28E-03 |
| <i>Slamf9</i>        | NM_029612              | 2.58  | 5.29E-03 |
| <i>Ccr12</i>         | NM_017466              | 0.60  | 5.31E-03 |
| <i>Junb</i>          | NM_008416              | 0.41  | 5.32E-03 |
| <i>Igf1</i>          | NM_010512              | 1.58  | 5.32E-03 |
| <i>Btg1</i>          | NM_007569              | -0.69 | 5.34E-03 |
| <i>Stk10</i>         | NM_009288              | 0.46  | 5.34E-03 |
| <i>Rmnd1</i>         | NM_025343              | -0.47 | 5.34E-03 |
| <i>Angptl4</i>       | NM_020581              | 1.14  | 5.39E-03 |
| <i>Wdr59</i>         | AK173301               | -0.51 | 5.41E-03 |
| <i>Tspan33</i>       | NM_146173              | 1.41  | 5.43E-03 |
| <i>5730455P16Rik</i> | NM_027472              | -0.43 | 5.43E-03 |
| <i>H2-K1</i>         | AK150790               | 0.63  | 5.47E-03 |
| <i>Igfbp3</i>        | NM_008343              | 0.42  | 5.47E-03 |
| <i>Cd248</i>         | NM_054042              | -1.28 | 5.53E-03 |
| <i>Col4a3bp</i>      | AK020301               | 0.54  | 5.55E-03 |
| <i>Gcnt1</i>         | NM_173442              | 1.86  | 5.64E-03 |
| <i>P2rx7</i>         | NM_011027              | 1.80  | 5.64E-03 |
| <i>Ldb2</i>          | NM_001077398           | -0.86 | 5.66E-03 |
| <i>Exoc6</i>         | NM_175353              | 1.06  | 5.67E-03 |
| <i>NA</i>            | ENSMUST0000010256<br>3 | 2.25  | 5.69E-03 |
| <i>Rgs2</i>          | NM_009061              | 1.23  | 5.72E-03 |
| <i>Sirpa</i>         | NM_007547              | 0.61  | 5.78E-03 |
| <i>Prrx1</i>         | NM_175686              | -1.21 | 5.79E-03 |
| <i>Tpd52l1</i>       | NM_009413              | 0.91  | 5.80E-03 |
| <i>Gpr183</i>        | NM_183031              | 1.53  | 5.81E-03 |
| <i>Csnk1g3</i>       | NM_152809              | -0.50 | 5.82E-03 |
| <i>Tob1</i>          | NM_009427              | -0.57 | 5.84E-03 |

|                      |              |       |          |
|----------------------|--------------|-------|----------|
| <i>Sirpa</i>         | NM_007547    | 0.45  | 5.86E-03 |
| <i>Fam38b</i>        | BC075677     | -0.42 | 5.87E-03 |
| <i>Abcb1b</i>        | NM_011075    | 0.48  | 5.89E-03 |
| <i>Gm11428</i>       | BC089618     | 1.88  | 5.93E-03 |
| <i>Hist3h2a</i>      | NM_178218    | 0.77  | 5.93E-03 |
| <i>Arf5</i>          | NM_007480    | -0.58 | 5.93E-03 |
| <i>Tnfsf11</i>       | NM_011613    | -0.85 | 5.96E-03 |
| <i>Rgs1</i>          | NM_015811    | 1.40  | 5.97E-03 |
| <i>Cybb</i>          | NM_007807    | 1.87  | 5.97E-03 |
| <i>Irg1</i>          | L38281       | 1.76  | 5.97E-03 |
| <i>BC004728</i>      | NM_174992    | 1.66  | 6.01E-03 |
| <i>Il1b</i>          | NM_008361    | 2.25  | 6.04E-03 |
| <i>Cryl1</i>         | NM_030004    | 0.58  | 6.06E-03 |
| NA                   | NAP055718-1  | 0.52  | 6.06E-03 |
| <i>C80913</i>        | NM_011274    | -0.50 | 6.07E-03 |
| <i>Tubb3</i>         | NM_023279    | -0.58 | 6.08E-03 |
| <i>Il1b</i>          | NM_008361    | 2.26  | 6.09E-03 |
| <i>Cfh</i>           | NM_009888    | 1.79  | 6.11E-03 |
| <i>Fgd2</i>          | NM_013710    | 1.78  | 6.14E-03 |
| <i>Unc13d</i>        | NM_001009573 | 0.42  | 6.14E-03 |
| <i>Gvin1</i>         | NM_029000    | 1.16  | 6.15E-03 |
| NA                   | NM_019909    | 0.66  | 6.15E-03 |
| <i>Mrc1</i>          | NM_008625    | 2.42  | 6.15E-03 |
| <i>Laptm5</i>        | NM_010686    | 1.82  | 6.17E-03 |
| <i>Tmem180</i>       | NM_029186    | 0.63  | 6.20E-03 |
| <i>Mef2c</i>         | NM_025282    | 0.46  | 6.20E-03 |
| <i>1700029G01Rik</i> | NM_025856    | -0.44 | 6.21E-03 |
| <i>Slc9a3r2</i>      | NM_023449    | -0.40 | 6.21E-03 |
| <i>Il1b</i>          | NM_008361    | 2.15  | 6.21E-03 |
| <i>Prkcb</i>         | NM_008855    | 1.98  | 6.22E-03 |
| <i>Tubb3</i>         | NM_023279    | -0.54 | 6.25E-03 |
| <i>Gm9885</i>        | BC006942     | -0.57 | 6.26E-03 |
| <i>Sppl3</i>         | NM_029012    | -0.43 | 6.28E-03 |
| <i>Tubb3</i>         | NM_023279    | -0.57 | 6.28E-03 |
| <i>Rnase6</i>        | NM_030098    | 0.49  | 6.29E-03 |
| <i>Sox9</i>          | NM_011448    | -0.69 | 6.30E-03 |
| <i>Trem3</i>         | NM_021407    | 0.54  | 6.33E-03 |
| <i>Epha4</i>         | NM_007936    | 0.58  | 6.33E-03 |
| <i>A630001G21Rik</i> | AK041324     | 0.70  | 6.33E-03 |
| <i>Il1b</i>          | NM_008361    | 2.33  | 6.36E-03 |
| <i>H2-K1</i>         | AK150790     | 0.63  | 6.37E-03 |
| <i>H2-K1</i>         | AK150790     | 0.61  | 6.40E-03 |
| <i>Pck2</i>          | NM_028994    | -1.23 | 6.40E-03 |
| <i>H1f0</i>          | NM_008197    | -0.56 | 6.41E-03 |
| <i>Klra22</i>        | NM_053152    | 0.64  | 6.46E-03 |

|                  |             |       |          |
|------------------|-------------|-------|----------|
| NA               | NAP066348-1 | 0.91  | 6.48E-03 |
| NA               | NAP057003-1 | 0.54  | 6.52E-03 |
| <i>Tinagl1</i>   | NM_023476   | -1.13 | 6.53E-03 |
| <i>Pgm2l1</i>    | NM_027629   | 0.41  | 6.55E-03 |
| <i>E2f2</i>      | NM_177733   | 0.94  | 6.56E-03 |
| <i>Cd244</i>     | NM_018729   | 2.92  | 6.57E-03 |
| <i>Fes</i>       | NM_010194   | 0.98  | 6.58E-03 |
| <i>Sec16b</i>    | NM_033354   | -1.04 | 6.61E-03 |
| <i>Wnt10a</i>    | NM_009518   | -0.98 | 6.64E-03 |
| <i>Rai14</i>     | NM_030690   | -1.15 | 6.66E-03 |
| <i>Lcp2</i>      | NM_010696   | 2.29  | 6.67E-03 |
| <i>Fam20a</i>    | NM_153782   | -0.71 | 6.69E-03 |
| <i>Dna2</i>      | AK129051    | 0.43  | 6.74E-03 |
| <i>Slc1a4</i>    | NM_018861   | -0.85 | 6.77E-03 |
| <i>Dlk1</i>      | NM_010052   | -1.12 | 6.78E-03 |
| <i>Nav1</i>      | NM_173437   | -0.65 | 6.78E-03 |
| <i>Cds1</i>      | NM_173370   | 0.44  | 6.82E-03 |
| <i>Mboat2</i>    | NM_026037   | 0.48  | 6.84E-03 |
| <i>Irg1</i>      | AK152177    | 2.00  | 6.85E-03 |
| <i>Grap</i>      | NM_027817   | 0.68  | 6.86E-03 |
| <i>Tnfrsf13b</i> | AK004668    | 0.97  | 6.86E-03 |
| <i>Acbd3</i>     | NM_133225   | -0.79 | 6.87E-03 |
| <i>Tmod3</i>     | NM_016963   | -1.07 | 6.88E-03 |
| <i>Fcgr4</i>     | NM_144559   | 1.21  | 6.88E-03 |
| <i>H2-K1</i>     | AK150790    | 0.64  | 6.92E-03 |
| <i>Tubb3</i>     | NM_023279   | -0.58 | 6.92E-03 |
| <i>Hoxb9</i>     | NM_008270   | -0.69 | 6.92E-03 |
| <i>Cd300ld</i>   | NM_145437   | 0.77  | 6.95E-03 |
| <i>Fam98b</i>    | NM_026620   | 0.44  | 6.95E-03 |
| <i>Abcb4</i>     | NM_008830   | 0.58  | 7.04E-03 |
| NA               | XM_994784   | 0.47  | 7.06E-03 |
| <i>Reg3a</i>     | NM_011259   | 0.48  | 7.08E-03 |
| <i>Hisppd1</i>   | AK087712    | -0.43 | 7.09E-03 |
| <i>Ccr5</i>      | NM_009917   | 2.78  | 7.09E-03 |
| <i>Rapgef5</i>   | AK122234    | 0.39  | 7.10E-03 |
| <i>Atpbd4</i>    | NM_025675   | -0.45 | 7.11E-03 |
| <i>Irgm2</i>     | NM_019440   | 0.64  | 7.11E-03 |
| <i>Rprm</i>      | NM_023396   | 1.04  | 7.14E-03 |
| <i>Coro2a</i>    | NM_178893   | 0.42  | 7.14E-03 |
| <i>Cyp2j6</i>    | NM_010008   | -0.48 | 7.14E-03 |
| <i>Frdm4b</i>    | NM_145148   | 1.34  | 7.15E-03 |
| <i>Tubb3</i>     | NM_023279   | -0.57 | 7.15E-03 |
| <i>Spopl</i>     | AK088955    | -0.39 | 7.15E-03 |
| <i>Ahcyl1</i>    | NM_145542   | -0.49 | 7.16E-03 |
| <i>Tmem106a</i>  | NM_144830   | 0.70  | 7.17E-03 |

|                      |                        |       |          |
|----------------------|------------------------|-------|----------|
| <i>Nat8l</i>         | NM_001001985           | 1.22  | 7.19E-03 |
| <i>Srf</i>           | NM_020493              | 0.39  | 7.21E-03 |
| <i>Acta2</i>         | NM_007392              | 0.74  | 7.22E-03 |
| <i>9330180L21Rik</i> | AK029771               | 0.51  | 7.24E-03 |
| <i>Tlr2</i>          | NM_011905              | 2.09  | 7.28E-03 |
| <i>Kdelr1</i>        | NM_133950              | -1.19 | 7.29E-03 |
| <i>Cse1l</i>         | NM_023565              | -0.51 | 7.32E-03 |
| <i>Serpinb10</i>     | NM_198028              | 0.71  | 7.36E-03 |
| <i>Fbxl3</i>         | NM_015822              | -0.49 | 7.39E-03 |
| <i>Bdnf</i>          | NM_007540              | -0.40 | 7.40E-03 |
| <i>Abhd14a</i>       | NM_145919              | -0.46 | 7.43E-03 |
| <i>Gstz1</i>         | NM_010363              | -0.39 | 7.45E-03 |
| <i>Syng1</i>         | NM_009303              | 1.47  | 7.47E-03 |
| <i>Cmb1</i>          | NM_181588              | -0.66 | 7.48E-03 |
| <i>Prkg2</i>         | NM_008926              | -0.57 | 7.54E-03 |
| <i>Scn1b</i>         | NM_011322              | -0.57 | 7.54E-03 |
| <i>Rasgef1b</i>      | NM_181318              | 1.16  | 7.60E-03 |
| <i>Plcb2</i>         | NM_177568              | 0.51  | 7.61E-03 |
| <i>Arcn1</i>         | NM_145985              | -0.70 | 7.64E-03 |
| <i>Rprm</i>          | NM_023396              | 1.03  | 7.65E-03 |
| <i>Rab32</i>         | NM_026405              | 0.81  | 7.66E-03 |
| <i>Rag1ap1</i>       | NM_009057              | -0.49 | 7.68E-03 |
| <i>Stk17b</i>        | NM_133810              | 0.40  | 7.69E-03 |
| <i>Tubb3</i>         | NM_023279              | -0.54 | 7.72E-03 |
| <i>Ano1</i>          | NM_178642              | -0.99 | 7.73E-03 |
| <i>Nfx1</i>          | NM_023739              | -0.62 | 7.73E-03 |
| <i>Il1b</i>          | NM_008361              | 2.23  | 7.73E-03 |
| <i>Tlr2</i>          | NM_011905              | 2.16  | 7.75E-03 |
| <i>Rpl13</i>         | NM_016738              | -0.38 | 7.75E-03 |
| <i>Cdk5rap3</i>      | NM_030248              | -0.43 | 7.75E-03 |
| <i>Lilrb4</i>        | NM_013532              | 1.98  | 7.77E-03 |
| <i>Pilrb2</i>        | NM_001024932           | 0.48  | 7.77E-03 |
| <i>Rhoq</i>          | NM_145491              | -0.46 | 7.80E-03 |
| <i>Rcn1</i>          | NM_009037              | -0.68 | 7.81E-03 |
| <i>Osbp1a</i>        | NM_207530              | -0.41 | 7.85E-03 |
| <i>Rpl5</i>          | NM_016980              | 0.44  | 7.85E-03 |
| NA                   | ENSMUST0000010059<br>8 | -0.49 | 7.88E-03 |
| <i>Lrrn3</i>         | NM_010733              | -0.50 | 7.89E-03 |
| <i>Tubb3</i>         | NM_023279              | -0.52 | 7.93E-03 |
| <i>Rai14</i>         | NM_030690              | -0.84 | 7.93E-03 |
| <i>Bcat1</i>         | NM_001024468           | -0.81 | 7.94E-03 |
| <i>My19</i>          | BC055439               | 0.50  | 7.96E-03 |
| <i>Tlr7</i>          | NM_133211              | 2.04  | 7.97E-03 |
| <i>Nqo1</i>          | NM_008706              | -0.78 | 7.99E-03 |

|                      |              |       |          |
|----------------------|--------------|-------|----------|
| <i>Pir</i>           | NM_027153    | -0.88 | 8.01E-03 |
| <i>Ccl12</i>         | NM_011331    | 4.03  | 8.03E-03 |
| <i>Plcl2</i>         | NM_013880    | 1.11  | 8.11E-03 |
| <i>Bri3bp</i>        | NM_029752    | -0.59 | 8.14E-03 |
| <i>Farp2</i>         | NM_145519    | -0.60 | 8.15E-03 |
| <i>Sdc4</i>          | NM_011521    | 0.41  | 8.16E-03 |
| <i>Nlrp6</i>         | BC031139     | 0.61  | 8.16E-03 |
| <i>Mrc2</i>          | NM_008626    | -0.73 | 8.17E-03 |
| <i>Pop4</i>          | NM_025390    | 0.42  | 8.18E-03 |
| <i>Papola</i>        | NM_011112    | -0.40 | 8.21E-03 |
| <i>Il1b</i>          | NM_008361    | 2.18  | 8.25E-03 |
| <i>Hmgcs1</i>        | NM_145942    | -0.81 | 8.25E-03 |
| <i>Ppargc1b</i>      | AK042378     | 0.39  | 8.26E-03 |
| <i>Il1b</i>          | NM_008361    | 2.18  | 8.28E-03 |
| <i>Trpc6</i>         | NM_013838    | -0.58 | 8.29E-03 |
| <i>Galnt9</i>        | NM_198306    | -1.23 | 8.30E-03 |
| <i>5430435G22Rik</i> | NM_145509    | 0.95  | 8.30E-03 |
| <i>Il2rg</i>         | NM_013563    | 0.79  | 8.30E-03 |
| <i>Bcl3</i>          | NM_033601    | 0.67  | 8.32E-03 |
| <i>Tlr2</i>          | NM_011905    | 2.08  | 8.40E-03 |
| <i>Rnf2</i>          | NM_011277    | -0.56 | 8.40E-03 |
| <i>Hck</i>           | NM_010407    | 1.61  | 8.41E-03 |
| <i>Nacad</i>         | BC072589     | -0.51 | 8.42E-03 |
| <i>Ctsc</i>          | NM_009982    | 2.39  | 8.47E-03 |
| <i>Sash3</i>         | NM_028773    | 1.74  | 8.47E-03 |
| <i>Icam1</i>         | NM_010493    | 0.61  | 8.48E-03 |
| <i>Cyth4</i>         | NM_028195    | 1.34  | 8.48E-03 |
| <i>Maf</i>           | AK132165     | 0.50  | 8.49E-03 |
| <i>Nptx2</i>         | NM_016789    | 0.51  | 8.49E-03 |
| <i>Sepp1</i>         | NM_001042614 | 2.39  | 8.50E-03 |
| <i>NA</i>            | XM_130987    | -1.25 | 8.51E-03 |
| <i>Ssbp3</i>         | NM_023672    | -0.68 | 8.52E-03 |
| <i>Ucp2</i>          | NM_011671    | 1.29  | 8.52E-03 |
| <i>Atp2c1</i>        | NM_175025    | 0.73  | 8.53E-03 |
| <i>Tlr2</i>          | NM_011905    | 2.14  | 8.55E-03 |
| <i>Ccdc45</i>        | AK089185     | -0.36 | 8.56E-03 |
| <i>Nsbp1</i>         | NM_016710    | 0.84  | 8.58E-03 |
| <i>Dnase1l1</i>      | NM_027109    | 0.42  | 8.59E-03 |
| <i>Lmbr1</i>         | NM_020295    | -0.55 | 8.60E-03 |
| <i>Ccr12</i>         | NM_017466    | 0.42  | 8.60E-03 |
| <i>Abcg2</i>         | NM_011920    | 0.61  | 8.61E-03 |
| <i>H2-K1</i>         | AK150790     | 0.65  | 8.68E-03 |
| <i>Adcy3</i>         | NM_138305    | -0.84 | 8.71E-03 |
| <i>Dhfr</i>          | NM_010049    | 0.53  | 8.72E-03 |
| <i>Gamt</i>          | NM_010255    | -0.56 | 8.72E-03 |

|                      |              |       |          |
|----------------------|--------------|-------|----------|
| <i>Bst2</i>          | NM_198095    | 0.73  | 8.82E-03 |
| <i>Gng2</i>          | NM_010315    | 0.58  | 8.82E-03 |
| <i>Lrrc42</i>        | NM_029985    | -0.47 | 8.82E-03 |
| <i>Tubb3</i>         | NM_023279    | -0.58 | 8.82E-03 |
| <i>C330007P06Rik</i> | BC021479     | -0.41 | 8.84E-03 |
| <i>Cab39</i>         | NM_133781    | 0.40  | 8.89E-03 |
| <i>Caprin1</i>       | AK051363     | 0.36  | 8.90E-03 |
| <i>Rab19</i>         | NM_011226    | 0.77  | 8.93E-03 |
| <i>2810055F11Rik</i> | NM_026038    | -0.40 | 8.94E-03 |
| <i>Klf11</i>         | NM_178357    | -0.36 | 8.96E-03 |
| <i>Ifitm6</i>        | NM_001033632 | 0.50  | 8.98E-03 |
| <i>Tlr2</i>          | NM_011905    | 2.11  | 9.04E-03 |
| <i>Tlr2</i>          | NM_011905    | 2.17  | 9.05E-03 |
| <i>1200016E24Rik</i> | AK035396     | 1.28  | 9.05E-03 |
| <i>Adnp</i>          | NM_009628    | -0.42 | 9.08E-03 |
| <i>Tcf15</i>         | NM_178254    | -0.68 | 9.08E-03 |
| <i>NA</i>            | BB345768     | 0.37  | 9.12E-03 |
| <i>Tlr2</i>          | NM_011905    | 2.13  | 9.15E-03 |
| <i>Spag4</i>         | NM_139151    | -0.41 | 9.20E-03 |
| <i>Papola</i>        | NM_011112    | -0.53 | 9.20E-03 |
| <i>Aif1</i>          | NM_019467    | 3.16  | 9.21E-03 |
| <i>Cox17</i>         | NM_001017429 | 0.53  | 9.38E-03 |
| <i>NA</i>            | NAP108462-1  | -0.65 | 9.38E-03 |
| <i>Satb2</i>         | AK129270     | -0.63 | 9.39E-03 |
| <i>Crabp1</i>        | NM_013496    | -0.95 | 9.40E-03 |
| <i>Enpp1</i>         | NM_008813    | 0.69  | 9.42E-03 |
| <i>Trerf1</i>        | NM_172622    | -0.51 | 9.42E-03 |
| <i>Pgap2</i>         | AK152420     | -0.49 | 9.44E-03 |
| <i>Klf4</i>          | NM_010637    | -1.78 | 9.44E-03 |
| <i>Tlr2</i>          | NM_011905    | 2.11  | 9.49E-03 |
| <i>Mboat2</i>        | NM_026037    | 1.02  | 9.49E-03 |
| <i>Cd34</i>          | NM_133654    | 1.61  | 9.50E-03 |
| <i>Pi4k2b</i>        | NM_028744    | -0.43 | 9.54E-03 |
| <i>D430006K04</i>    | AK084893     | 0.41  | 9.54E-03 |
| <i>Zbtb1</i>         | NM_178744    | -0.58 | 9.57E-03 |
| <i>Prss16</i>        | NM_019429    | 0.35  | 9.58E-03 |
| <i>Dlg5</i>          | AK147699     | -0.71 | 9.58E-03 |
| <i>Syngr1</i>        | NM_009303    | 1.87  | 9.59E-03 |
| <i>Zfp788</i>        | NM_023363    | -0.38 | 9.60E-03 |
| <i>Chpt1</i>         | NM_144807    | -0.48 | 9.60E-03 |
| <i>Decr2</i>         | NM_011933    | -0.35 | 9.60E-03 |
| <i>Serpib8</i>       | NM_011459    | -0.37 | 9.61E-03 |
| <i>Ftsjd1</i>        | NM_146215    | -0.51 | 9.63E-03 |
| <i>Tubb3</i>         | NM_023279    | -0.57 | 9.64E-03 |
| <i>Gamt</i>          | NM_010255    | -0.61 | 9.70E-03 |



|                 |             |       |          |
|-----------------|-------------|-------|----------|
| <i>Slco4a1</i>  | NM_148933   | 1.97  | 9.70E-03 |
| <i>Selplg</i>   | NM_009151   | 2.52  | 9.72E-03 |
| <i>Acss1</i>    | NM_080575   | 2.12  | 9.76E-03 |
| <i>Arl11</i>    | NM_177337   | 0.72  | 9.77E-03 |
| <i>Rai14</i>    | NM_030690   | -0.70 | 9.78E-03 |
| <i>Pisd-ps3</i> | AK161130    | 0.69  | 9.80E-03 |
| <i>Kif7</i>     | BC034093    | -0.43 | 9.81E-03 |
| <i>Bmpr1a</i>   | NM_009758   | -0.46 | 9.82E-03 |
| <i>Ddr2</i>     | AK035414    | -1.27 | 9.83E-03 |
| <i>NA</i>       | NAP057026-1 | -0.41 | 9.84E-03 |
| <i>Cdk6</i>     | AK030810    | 0.79  | 9.84E-03 |
| <i>NA</i>       | TC1574886   | 0.37  | 9.85E-03 |
| <i>Tlr2</i>     | NM_011905   | 2.11  | 9.86E-03 |
| <i>Seh1l</i>    | BC027244    | -0.47 | 9.86E-03 |
| <i>Frg1</i>     | NM_013522   | -0.73 | 9.87E-03 |
| <i>Tmem143</i>  | NM_144801   | -0.55 | 9.89E-03 |
| <i>Rem1</i>     | NM_009047   | -0.40 | 9.92E-03 |
| <i>Alox5</i>    | NM_009662   | 2.10  | 9.93E-03 |
| <i>Ptn</i>      | NM_008973   | -1.64 | 1.00E-02 |

**Supplementary Table S4: Gene Ontology analysis according to biological process (FDR<0.05) in SA1-null cells:** GO terms downregulated in SA1-null cells (blue table) and GO terms upregulated in SA1-null cells (red table) are listed.

| GO term    | Description                                                              | FDR      |
|------------|--------------------------------------------------------------------------|----------|
| GO:0045947 | negative regulation of translational initiation                          | 4.00E-02 |
| GO:0006613 | cotranslational protein targeting to membrane                            | 4.53E-02 |
| GO:0016126 | sterol biosynthetic process                                              | 2.30E-02 |
| GO:0007224 | smoothed signaling pathway                                               | 4.21E-02 |
| GO:0045667 | regulation of osteoblast differentiation                                 | 4.53E-02 |
| GO:0007179 | transforming growth factor beta receptor signaling pathway               | 1.11E-02 |
| GO:0035108 | limb morphogenesis                                                       | 3.96E-03 |
| GO:0030326 | embryonic limb morphogenesis                                             | 7.83E-03 |
| GO:0060173 | limb development                                                         | 3.85E-03 |
| GO:0048754 | branching morphogenesis of a tube                                        | 1.81E-02 |
| GO:0001763 | morphogenesis of a branching structure                                   | 1.11E-02 |
| GO:0048706 | embryonic skeletal system development                                    | 1.81E-02 |
| GO:0007178 | transmembrane receptor protein serine/threonine kinase signaling pathway | 3.00E-03 |
| GO:0048705 | skeletal system morphogenesis                                            | 2.13E-02 |
| GO:0030324 | lung development                                                         | 4.19E-02 |
| GO:0060541 | respiratory system development                                           | 3.15E-02 |
| GO:0016055 | Wnt receptor signaling pathway                                           | 1.60E-02 |
| GO:0035239 | tube morphogenesis                                                       | 1.76E-02 |
| GO:0030323 | respiratory tube development                                             | 4.53E-02 |
| GO:0006520 | cellular amino acid metabolic process                                    | 3.96E-03 |
| GO:0001501 | skeletal system development                                              | 5.92E-04 |
| GO:0001503 | ossification                                                             | 1.60E-02 |
| GO:0007507 | heart development                                                        | 1.11E-02 |
| GO:0006396 | RNA processing                                                           | 9.45E-07 |
| GO:0060348 | bone development                                                         | 3.15E-02 |
| GO:0016568 | chromatin modification                                                   | 4.43E-03 |
| GO:0007167 | enzyme linked receptor protein signaling pathway                         | 2.19E-03 |
| GO:0048729 | tissue morphogenesis                                                     | 4.07E-02 |
| GO:0006281 | DNA repair                                                               | 4.43E-03 |
| GO:0048598 | embryonic morphogenesis                                                  | 1.11E-02 |
| GO:0034984 | response to DNA damage stimulus                                          | 4.93E-03 |
| GO:0043009 | chordate embryonic development                                           | 1.60E-02 |
| GO:0044262 | cellular carbohydrate metabolic process                                  | 4.00E-02 |
| GO:0009792 | embryo development ending in birth or egg hatching                       | 1.81E-02 |
| GO:0008610 | lipid biosynthetic process                                               | 4.53E-02 |
| GO:0006412 | translation                                                              | 3.11E-03 |

| GO term    | Description                                               | FDR      |
|------------|-----------------------------------------------------------|----------|
| GO:0051726 | regulation of cell cycle                                  | 4.74E-02 |
| GO:0043066 | negative regulation of apoptosis                          | 4.09E-02 |
| GO:0060548 | negative regulation of cell death                         | 2.85E-02 |
| GO:0043069 | negative regulation of programmed cell death              | 2.83E-02 |
| GO:0048514 | blood vessel morphogenesis                                | 4.10E-02 |
| GO:0007265 | Ras protein signal transduction                           | 4.09E-02 |
| GO:0045595 | regulation of cell differentiation                        | 1.02E-03 |
| GO:0007243 | intracellular protein kinase cascade                      | 7.88E-04 |
| GO:0000165 | MAPKKK cascade                                            | 3.00E-02 |
| GO:0046903 | secretion                                                 | 8.78E-04 |
| GO:0001932 | regulation of protein phosphorylation                     | 4.12E-02 |
| GO:0009967 | positive regulation of signal transduction                | 5.90E-03 |
| GO:0042060 | wound healing                                             | 1.80E-02 |
| GO:0051270 | regulation of cellular component movement                 | 1.84E-02 |
| GO:0010942 | positive regulation of cell death                         | 4.66E-04 |
| GO:0006916 | anti-apoptosis                                            | 3.67E-02 |
| GO:0043068 | positive regulation of programmed cell death              | 4.35E-04 |
| GO:0045597 | positive regulation of cell differentiation               | 5.24E-03 |
| GO:0043065 | positive regulation of apoptosis                          | 4.22E-04 |
| GO:0051046 | regulation of secretion                                   | 8.50E-03 |
| GO:0032940 | secretion by cell                                         | 3.15E-04 |
| GO:0006887 | exocytosis                                                | 4.09E-02 |
| GO:0016477 | cell migration                                            | 4.80E-05 |
| GO:0051247 | positive regulation of protein metabolic process          | 1.34E-02 |
| GO:0008284 | positive regulation of cell proliferation                 | 3.42E-02 |
| GO:0007599 | hemostasis                                                | 3.03E-02 |
| GO:0007596 | blood coagulation                                         | 2.88E-02 |
| GO:0043408 | regulation of MAPKKK cascade                              | 4.74E-02 |
| GO:0030334 | regulation of cell migration                              | 6.52E-03 |
| GO:0032270 | positive regulation of cellular protein metabolic process | 8.00E-03 |
| GO:0006865 | amino acid transport                                      | 4.09E-02 |
| GO:0006917 | induction of apoptosis                                    | 2.41E-04 |
| GO:0006897 | endocytosis                                               | 1.77E-04 |
| GO:0030036 | actin cytoskeleton organization                           | 4.01E-02 |
| GO:0018108 | peptidyl-tyrosine phosphorylation                         | 1.63E-02 |
| GO:0002520 | immune system development                                 | 4.12E-07 |
| GO:0019216 | regulation of lipid metabolic process                     | 2.17E-02 |
| GO:0032880 | regulation of protein localization                        | 2.44E-03 |
| GO:0030217 | T cell differentiation                                    | 5.09E-03 |
| GO:0051054 | positive regulation of DNA metabolic process              | 4.45E-02 |
| GO:0034101 | erythrocyte homeostasis                                   | 1.94E-02 |

|            |                                                          |          |
|------------|----------------------------------------------------------|----------|
| GO:0050730 | regulation of peptidyl-tyrosine phosphorylation          | 2.85E-02 |
| GO:0032946 | positive regulation of mononuclear cell proliferation    | 2.85E-02 |
| GO:0034097 | response to cytokine stimulus                            | 7.25E-03 |
| GO:0001894 | tissue homeostasis                                       | 2.70E-02 |
| GO:0030097 | hemopoiesis                                              | 4.09E-08 |
| GO:0048872 | homeostasis of number of cells                           | 4.22E-04 |
| GO:0030099 | myeloid cell differentiation                             | 7.89E-05 |
| GO:0009968 | negative regulation of signal transduction               | 1.22E-02 |
| GO:0002573 | myeloid leukocyte differentiation                        | 1.25E-02 |
| GO:0032943 | mononuclear cell proliferation                           | 1.70E-04 |
| GO:0042110 | T cell activation                                        | 3.64E-06 |
| GO:0042113 | B cell activation                                        | 2.45E-04 |
| GO:0070201 | regulation of establishment of protein localization      | 4.66E-04 |
| GO:0043123 | positive regulation of I-kappaB kinase/NF-kappaB cascade | 5.90E-03 |
| GO:0042098 | T cell proliferation                                     | 1.20E-03 |
| GO:0043410 | positive regulation of MAPKKK cascade                    | 1.34E-02 |
| GO:0030098 | lymphocyte differentiation                               | 1.29E-05 |
| GO:0050727 | regulation of inflammatory response                      | 2.58E-03 |
| GO:0051223 | regulation of protein transport                          | 3.10E-04 |
| GO:0043122 | regulation of I-kappaB kinase/NF-kappaB cascade          | 1.38E-03 |
| GO:0007015 | actin filament organization                              | 3.41E-02 |
| GO:0046649 | lymphocyte activation                                    | 2.89E-10 |
| GO:0019221 | cytokine-mediated signaling pathway                      | 9.91E-04 |
| GO:0032496 | response to lipopolysaccharide                           | 5.20E-04 |
| GO:0045767 | regulation of anti-apoptosis                             | 4.20E-02 |
| GO:0045619 | regulation of lymphocyte differentiation                 | 2.46E-03 |
| GO:0050776 | regulation of immune response                            | 5.40E-09 |
| GO:0022904 | respiratory electron transport chain                     | 2.26E-02 |
| GO:0002443 | leukocyte mediated immunity                              | 3.27E-07 |
| GO:0050778 | positive regulation of immune response                   | 4.85E-07 |
| GO:0007249 | I-kappaB kinase/NF-kappaB cascade                        | 2.97E-05 |
| GO:0030183 | B cell differentiation                                   | 3.08E-03 |
| GO:0046631 | alpha-beta T cell activation                             | 3.08E-03 |
| GO:0002237 | response to molecule of bacterial origin                 | 3.09E-05 |
| GO:0001909 | leukocyte mediated cytotoxicity                          | 4.19E-03 |
| GO:0051341 | regulation of oxidoreductase activity                    | 1.50E-02 |
| GO:0042773 | ATP synthesis coupled electron transport                 | 4.87E-02 |
| GO:0050863 | regulation of T cell activation                          | 7.14E-03 |
| GO:0045087 | innate immune response                                   | 2.57E-07 |
| GO:0045639 | positive regulation of myeloid cell differentiation      | 2.69E-02 |
| GO:0002253 | activation of immune response                            | 5.92E-06 |
| GO:0006954 | inflammatory response                                    | 1.18E-15 |
| GO:0006904 | vesicle docking involved in exocytosis                   | 4.45E-02 |

|            |                                                                       |          |
|------------|-----------------------------------------------------------------------|----------|
| GO:0050714 | positive regulation of protein secretion                              | 5.90E-03 |
| GO:0019724 | B cell mediated immunity                                              | 7.45E-06 |
| GO:0002821 | positive regulation of adaptive immune response                       | 3.00E-03 |
| GO:0009306 | protein secretion                                                     | 1.22E-05 |
| GO:0042129 | regulation of T cell proliferation                                    | 3.99E-02 |
| GO:0002367 | cytokine production involved in immune response                       | 4.10E-02 |
| GO:0002286 | T cell activation involved in immune response                         | 4.10E-02 |
| GO:0009617 | response to bacterium                                                 | 2.89E-10 |
| GO:0051272 | positive regulation of cellular component movement                    | 9.94E-03 |
| GO:0050729 | positive regulation of inflammatory response                          | 1.09E-02 |
| GO:0006935 | chemotaxis                                                            | 2.44E-10 |
| GO:0050708 | regulation of protein secretion                                       | 3.33E-04 |
| GO:0045637 | regulation of myeloid cell differentiation                            | 1.76E-04 |
| GO:0045833 | negative regulation of lipid metabolic process                        | 3.71E-02 |
| GO:0006898 | receptor-mediated endocytosis                                         | 1.02E-03 |
| GO:0050671 | positive regulation of lymphocyte proliferation                       | 3.40E-02 |
| GO:0030155 | regulation of cell adhesion                                           | 3.83E-02 |
| GO:0030335 | positive regulation of cell migration                                 | 7.23E-03 |
| GO:0045061 | thymic T cell selection                                               | 3.26E-02 |
| GO:0051353 | positive regulation of oxidoreductase activity                        | 1.48E-02 |
| GO:0002768 | immune response-regulating cell surface receptor signaling pathway    | 7.89E-05 |
| GO:0042742 | defense response to bacterium                                         | 7.18E-07 |
| GO:0050670 | regulation of lymphocyte proliferation                                | 2.48E-03 |
| GO:0046651 | lymphocyte proliferation                                              | 2.60E-04 |
| GO:0043542 | endothelial cell migration                                            | 2.48E-03 |
| GO:0051251 | positive regulation of lymphocyte activation                          | 8.81E-04 |
| GO:0030168 | platelet activation                                                   | 4.89E-03 |
| GO:0050900 | leukocyte migration                                                   | 1.82E-06 |
| GO:0014048 | regulation of glutamate secretion                                     | 4.74E-02 |
| GO:0045580 | regulation of T cell differentiation                                  | 2.03E-02 |
| GO:0050715 | positive regulation of cytokine secretion                             | 9.96E-03 |
| GO:0016485 | protein processing                                                    | 2.60E-02 |
| GO:0042107 | cytokine metabolic process                                            | 1.36E-03 |
| GO:0032760 | positive regulation of tumor necrosis factor production               | 1.94E-02 |
| GO:0042089 | cytokine biosynthetic process                                         | 1.32E-03 |
| GO:0001934 | positive regulation of protein phosphorylation                        | 4.53E-02 |
| GO:0007229 | integrin-mediated signaling pathway                                   | 4.44E-02 |
| GO:0050867 | positive regulation of cell activation                                | 8.59E-05 |
| GO:0030100 | regulation of endocytosis                                             | 6.69E-03 |
| GO:0002541 | activation of plasma proteins involved in acute inflammatory response | 3.47E-02 |
| GO:0046632 | alpha-beta T cell differentiation                                     | 3.47E-02 |

|            |                                                                                       |          |
|------------|---------------------------------------------------------------------------------------|----------|
| GO:0009615 | response to virus                                                                     | 2.38E-03 |
| GO:0001817 | regulation of cytokine production                                                     | 1.77E-06 |
| GO:0051605 | protein maturation by peptide bond cleavage                                           | 3.83E-02 |
| GO:0033198 | response to ATP                                                                       | 1.43E-02 |
| GO:0002684 | positive regulation of immune system process                                          | 1.78E-09 |
| GO:0006956 | complement activation                                                                 | 2.96E-02 |
| GO:0060326 | cell chemotaxis                                                                       | 5.04E-06 |
| GO:0050870 | positive regulation of T cell activation                                              | 7.93E-04 |
| GO:0030595 | leukocyte chemotaxis                                                                  | 1.06E-05 |
| GO:0051604 | protein maturation                                                                    | 6.89E-03 |
| GO:0042035 | regulation of cytokine biosynthetic process                                           | 6.51E-04 |
| GO:0045577 | regulation of B cell differentiation                                                  | 1.23E-02 |
| GO:0002920 | regulation of humoral immune response                                                 | 1.23E-02 |
| GO:0050663 | cytokine secretion                                                                    | 4.80E-05 |
| GO:0002526 | acute inflammatory response                                                           | 1.24E-05 |
| GO:0042102 | positive regulation of T cell proliferation                                           | 9.67E-03 |
| GO:0016064 | immunoglobulin mediated immune response                                               | 6.97E-05 |
| GO:0030593 | neutrophil chemotaxis                                                                 | 2.27E-04 |
| GO:0030218 | erythrocyte differentiation                                                           | 2.74E-02 |
| GO:0043534 | blood vessel endothelial cell migration                                               | 1.28E-03 |
| GO:0050830 | defense response to Gram-positive bacterium                                           | 1.28E-03 |
| GO:0050701 | interleukin- secretion                                                                | 2.28E-02 |
| GO:0050702 | interleukin- beta secretion                                                           | 2.28E-02 |
| GO:0032770 | positive regulation of monooxygenase activity                                         | 3.00E-03 |
| GO:0045582 | positive regulation of T cell differentiation                                         | 7.01E-03 |
| GO:0045840 | positive regulation of mitosis                                                        | 1.69E-02 |
| GO:0010595 | positive regulation of endothelial cell migration                                     | 4.82E-02 |
| GO:0032490 | detection of molecule of bacterial origin                                             | 4.82E-02 |
| GO:0046427 | positive regulation of JAK-STAT cascade                                               | 4.43E-02 |
| GO:0006910 | phagocytosis, recognition                                                             | 6.89E-03 |
| GO:0050851 | antigen receptor-mediated signaling pathway                                           | 4.64E-02 |
| GO:0045123 | cellular extravasation                                                                | 2.05E-03 |
| GO:0002455 | humoral immune response mediated by circulating immunoglobulin                        | 4.63E-03 |
| GO:0007159 | leukocyte cell-cell adhesion                                                          | 7.89E-05 |
| GO:0009408 | response to heat                                                                      | 1.71E-02 |
| GO:0006809 | nitric oxide biosynthetic process                                                     | 4.22E-03 |
| GO:0045638 | negative regulation of myeloid cell differentiation                                   | 1.19E-02 |
| GO:0043536 | positive regulation of blood vessel endothelial cell migration                        | 4.10E-02 |
| GO:0002925 | positive regulation of humoral immune response mediated by circulating immunoglobulin | 4.10E-02 |
| GO:0045621 | positive regulation of lymphocyte differentiation                                     | 1.26E-03 |
| GO:0045055 | regulated secretory pathway                                                           | 1.10E-02 |

|            |                                                                                  |          |
|------------|----------------------------------------------------------------------------------|----------|
| GO:0051971 | positive regulation of transmission of nerve impulse                             | 3.83E-02 |
| GO:0001819 | positive regulation of cytokine production                                       | 1.06E-05 |
| GO:0002923 | regulation of humoral immune response mediated by circulating immunoglobulin     | 1.26E-02 |
| GO:0050718 | positive regulation of interleukin- beta secretion                               | 3.37E-02 |
| GO:0019722 | calcium-mediated signaling                                                       | 1.20E-02 |
| GO:0032731 | positive regulation of interleukin- beta production                              | 1.00E-02 |
| GO:0002474 | antigen processing and presentation of peptide antigen via MHC class I           | 2.36E-02 |
| GO:0043367 | CD-positive, alpha-beta T cell differentiation                                   | 7.13E-03 |
| GO:0045428 | regulation of nitric oxide biosynthetic process                                  | 1.90E-03 |
| GO:0051607 | defense response to virus                                                        | 6.53E-03 |
| GO:0051222 | positive regulation of protein transport                                         | 9.71E-04 |
| GO:0045576 | mast cell activation                                                             | 1.32E-03 |
| GO:0006909 | phagocytosis                                                                     | 1.77E-06 |
| GO:0045807 | positive regulation of endocytosis                                               | 3.35E-04 |
| GO:0042226 | interleukin- biosynthetic process                                                | 1.37E-02 |
| GO:0045429 | positive regulation of nitric oxide biosynthetic process                         | 8.63E-04 |
| GO:0045408 | regulation of interleukin- biosynthetic process                                  | 1.19E-02 |
| GO:0050853 | B cell receptor signaling pathway                                                | 4.95E-02 |
| GO:0002891 | positive regulation of immunoglobulin mediated immune response                   | 2.63E-03 |
| GO:0002675 | positive regulation of acute inflammatory response                               | 1.08E-02 |
| GO:0002863 | positive regulation of inflammatory response to antigenic stimulus               | 4.30E-02 |
| GO:0002437 | inflammatory response to antigenic stimulus                                      | 1.32E-04 |
| GO:0043303 | mast cell degranulation                                                          | 4.61E-02 |
| GO:0032755 | positive regulation of interleukin- production                                   | 4.79E-04 |
| GO:0050710 | negative regulation of cytokine secretion                                        | 4.07E-02 |
| GO:0042534 | regulation of tumor necrosis factor biosynthetic process                         | 8.30E-03 |
| GO:0050764 | regulation of phagocytosis                                                       | 8.20E-05 |
| GO:0032651 | regulation of interleukin- beta production                                       | 3.69E-02 |
| GO:0006911 | phagocytosis, engulfment                                                         | 2.60E-04 |
| GO:0050766 | positive regulation of phagocytosis                                              | 3.24E-05 |
| GO:0042590 | antigen processing and presentation of exogenous peptide antigen via MHC class I | 2.32E-02 |
| GO:0048010 | vascular endothelial growth factor receptor signaling pathway                    | 5.75E-03 |
| GO:0016068 | type I hypersensitivity                                                          | 2.62E-02 |
| GO:0030851 | granulocyte differentiation                                                      | 2.62E-02 |
| GO:0001805 | positive regulation of type III hypersensitivity                                 | 1.54E-02 |
| GO:0002548 | monocyte chemotaxis                                                              | 1.38E-03 |
| GO:0030853 | negative regulation of granulocyte differentiation                               | 4.34E-02 |
| GO:0048525 | negative regulation of viral reproduction                                        | 3.69E-02 |
| GO:0009311 | oligosaccharide metabolic process                                                | 1.89E-02 |

|            |                                             |          |
|------------|---------------------------------------------|----------|
| GO:0009312 | oligosaccharide biosynthetic process        | 1.38E-02 |
| GO:0016998 | cell wall macromolecule catabolic process   | 1.38E-02 |
| GO:0050829 | defense response to Gram-negative bacterium | 1.30E-02 |
| GO:0005989 | lactose biosynthetic process                | 1.13E-02 |



**Supplementary Table S5: Gene Ontology Comparative Analysis according to biological process (FDR<0.05) in SA1-null and *Nipbl*-heterozygous MEFs. GO terms common in both models are shown in bold.**

**SA1-null MEFs**

| <b>GO TERM</b>                              | <b>Description</b>                                               | <b>FDR</b> |
|---------------------------------------------|------------------------------------------------------------------|------------|
| <b><i>Skeletal and bone development</i></b> |                                                                  |            |
| <b>GO:0001501</b>                           | <b><i>skeletal system development</i></b>                        | 5.92E-04   |
| GO:0001503                                  | ossification                                                     | 1.60E-02   |
| <b>GO:0048706</b>                           | <b><i>embryonic skeletal system development</i></b>              | 1.81E-02   |
| <b>GO:0048705</b>                           | <b><i>skeletal system morphogenesis</i></b>                      | 2.13E-02   |
| GO:0060348                                  | bone development                                                 | 3.15E-02   |
| GO:0045667                                  | regulation of osteoblast differentiation                         | 4.53E-02   |
| GO:0060173                                  | limb development                                                 | 3.85E-03   |
| GO:0035108                                  | limb morphogenesis                                               | 3.96E-03   |
| GO:0030326                                  | embryonic limb morphogenesis                                     | 7.83E-03   |
| <b><i>Morphogenesis</i></b>                 |                                                                  |            |
| <b>GO:0001763</b>                           | <b><i>morphogenesis of a branching structure</i></b>             | 1.11E-02   |
| GO:0048598                                  | embryonic morphogenesis                                          | 1.11E-02   |
| GO:0043009                                  | chordate embryonic development                                   | 1.60E-02   |
| GO:0035239                                  | tube morphogenesis                                               | 1.76E-02   |
| GO:0048754                                  | branching morphogenesis of a tube                                | 1.81E-02   |
| <b>GO:0009792</b>                           | <b><i>embryo development ending in birth or egg hatching</i></b> | 1.81E-02   |
| GO:0048729                                  | tissue morphogenesis                                             | 4.07E-02   |
| <b><i>Translation</i></b>                   |                                                                  |            |
| <b>GO:0006412</b>                           | <b><i>translation</i></b>                                        | 3.11E-03   |
| GO:0045947                                  | negative regulation of translational initiation                  | 4.00E-02   |
| <b><i>Heart &amp; Lung development</i></b>  |                                                                  |            |
| GO:0007507                                  | heart development                                                | 1.11E-02   |
| GO:0060541                                  | respiratory system development                                   | 3.15E-02   |
| GO:0030324                                  | lung development                                                 | 4.19E-02   |
| GO:0030323                                  | respiratory tube development                                     | 4.53E-02   |
| <b><i>Lipid metabolism</i></b>              |                                                                  |            |
| GO:0008610                                  | lipid biosynthetic process                                       | 4.53E-02   |

### *Nipbl*-heterozygous MEFs

| <b>GO TERM</b>                              | <b>Description</b>                                        | <b>FDR</b> |
|---------------------------------------------|-----------------------------------------------------------|------------|
| <b><i>Skeletal and bone development</i></b> |                                                           |            |
| <b>GO:0001501</b>                           | <b>skeletal system development</b>                        | 1.24E-02   |
| <b>GO:0048706</b>                           | <b>embryonic skeletal system development</b>              | 4.43E-02   |
| GO:0007519                                  | skeletal muscle tissue development                        | 4.58E-02   |
| GO:0002051                                  | osteoblast fate commitment                                | 3.42E-02   |
| <b>GO:0048705</b>                           | <b>skeletal system morphogenesis</b>                      | 1.57E-02   |
| <b><i>Morphogenesis</i></b>                 |                                                           |            |
| <b>GO:0009792</b>                           | <b>embryo development ending in birth or egg hatching</b> | 4.87E-02   |
| GO:0009880                                  | embryonic pattern specification                           | 4.91E-02   |
| <b>GO:0001763</b>                           | <b>morphogenesis of a branching structure</b>             | 3.82E-02   |
| GO:0031645                                  | negative regulation of neurological system process        | 2.22E-02   |
| GO:0007389                                  | pattern specification process                             | 2.80E-02   |
| <b><i>Translation</i></b>                   |                                                           |            |
| <b>GO:0006412</b>                           | <b>translation</b>                                        | 1.07E-02   |
| GO:0043039                                  | tRNA aminoacylation                                       | 1.02E-02   |
| <b><i>Heart &amp; Lung development</i></b>  |                                                           |            |
| GO:0002027                                  | regulation of heart rate                                  | 2.20E-02   |
| GO:0042310                                  | vasoconstriction                                          | 3.51E-03   |
| GO:0010460                                  | positive regulation of heart rate                         | 8.84E-03   |
| GO:0045823                                  | positive regulation of heart contraction                  | 1.21E-02   |
| GO:0045907                                  | positive regulation of vasoconstriction                   | 1.45E-02   |
| GO:0045777                                  | positive regulation of blood pressure                     | 1.77E-02   |
| <b><i>Lipid metabolism</i></b>              |                                                           |            |
| GO:0050873                                  | brown fat cell differentiation                            | 1.32E-03   |
| GO:0044255                                  | cellular lipid metabolic process                          | 2.24E-03   |
| GO:0046889                                  | positive regulation of lipid biosynthetic process         | 1.45E-02   |
| GO:0050872                                  | white fat cell differentiation                            | 1.68E-02   |
| GO:0019217                                  | regulation of fatty acid metabolic process                | 3.31E-02   |
| GO:0045834                                  | positive regulation of lipid metabolic process            | 3.53E-02   |
| GO:0045444                                  | fat cell differentiation                                  | 3.74E-02   |

**Supplementary Table S6: Differentially expressed genes in microarray analysis (FDR<0.15).** Genes validated by RT-qPCR are highlighted in blue.

| Gene Symbol     | Accession Number | FDR   | log <sub>2</sub> FC | SA1 (5kb up TSS) | Cluster |
|-----------------|------------------|-------|---------------------|------------------|---------|
| <i>Lyz1</i>     | NM_013590        | 0.092 | 3.63                |                  | ✓       |
| <i>AF251705</i> | NM_134158        | 0.103 | 1.87                |                  |         |
| <i>Alox5ap</i>  | NM_009663        | 0.103 | 2.67                |                  |         |
| <i>Arhgap30</i> | NM_001005508     | 0.103 | 2.19                |                  |         |
| <i>BC013712</i> | AK137465         | 0.103 | 2.83                |                  |         |
| <i>Casp1</i>    | NM_009807        | 0.103 | 2.19                |                  | ✓       |
| <i>Ccl6</i>     | NM_009139        | 0.103 | 2.26                |                  | ✓       |
| <i>Cd14</i>     | NM_009841        | 0.103 | 1.91                |                  |         |
| <i>Clec4a2</i>  | NM_011999        | 0.103 | 2.16                |                  | ✓       |
| <i>Clec4n</i>   | NM_020001        | 0.103 | 3.43                |                  | ✓       |
| <i>Clec5a</i>   | NM_001038604     | 0.103 | 3.31                |                  |         |
| <i>Dock10</i>   | XM_891407        | 0.103 | 1.43                |                  |         |
| <i>Ebi3</i>     | NM_015766        | 0.103 | 2.03                |                  |         |
| <i>Fcer1g</i>   | J05020           | 0.103 | 2.63                | ✓                |         |
| <i>Fyb</i>      | NM_011815        | 0.103 | 2.78                |                  |         |
| <i>Hpgd</i>     | NM_008278        | 0.103 | 1.75                |                  |         |
| <i>Igsf6</i>    | NM_030691        | 0.103 | 2.60                | ✓                |         |
| <i>Itgal</i>    | AK156251         | 0.103 | 2.32                |                  |         |
| <i>Lair1</i>    | NM_178611        | 0.103 | 2.57                |                  |         |
| <i>Lcp1</i>     | NM_008879        | 0.103 | 2.64                |                  |         |
| <i>Lrrc25</i>   | NM_153074        | 0.103 | 2.45                | ✓                |         |
| <i>Lyz2</i>     | NM_017372        | 0.103 | 3.55                |                  | ✓       |
| <i>Marco</i>    | NM_010766        | 0.103 | 2.94                |                  |         |
| <i>Mmp3</i>     | NM_010809        | 0.103 | 1.86                |                  |         |
| <i>Ms4a7</i>    | NM_001025610     | 0.103 | 3.08                |                  | ✓       |
| <i>Msr1</i>     | NM_031195        | 0.103 | 2.75                |                  |         |
| <i>Myo1f</i>    | NM_053214        | 0.103 | 2.12                | ✓                |         |
| <i>Ncf4</i>     | NM_008677        | 0.103 | 3.15                |                  |         |
| <i>Pilra</i>    | NM_153510        | 0.103 | 2.43                |                  | ✓       |
| <i>Pilrb1</i>   | NM_133209        | 0.103 | 2.31                |                  | ✓       |
| <i>Ptprc</i>    | NM_011210        | 0.103 | 2.95                |                  |         |
| <i>Rapgef5</i>  | AK122234         | 0.103 | 1.99                |                  |         |
| <i>Tcfec</i>    | NM_031198        | 0.103 | 1.33                |                  |         |
| <i>Tyrobp</i>   | NM_011662        | 0.103 | 3.13                |                  |         |
| <i>Tm6sf1</i>   | NM_145375        | 0.104 | 1.92                |                  |         |
| <i>Hk3</i>      | NM_001033245     | 0.107 | 1.32                |                  |         |
| <i>Rinl</i>     | NM_177158        | 0.107 | 1.17                |                  |         |
| <i>Acpl2</i>    | NM_153420        | 0.112 | -2.14               | ✓                |         |
| <i>Bcl2a1b</i>  | NM_007534        | 0.112 | 2.98                |                  |         |
| <i>Cxcl16</i>   | NM_023158        | 0.112 | 2.18                |                  |         |
| <i>Hcls1</i>    | NM_008225        | 0.112 | 3.03                |                  |         |
| <i>Lrrc33</i>   | NM_146069        | 0.112 | 2.75                |                  |         |
| <i>Ms4a6d</i>   | AB026047         | 0.112 | 2.92                | ✓                | ✓       |
| <i>Rnd1</i>     | NM_172612        | 0.112 | 1.32                |                  |         |
| <i>Tnf</i>      | NM_013693        | 0.112 | 1.20                |                  |         |
| <i>Lrmp</i>     | NM_008511        | 0.123 | 1.76                |                  |         |
| <i>Psmb9</i>    | NM_013585        | 0.123 | 1.34                |                  | ✓       |
| <i>Rgs14</i>    | NM_016758        | 0.123 | 1.15                |                  |         |
| <i>Ptpn7</i>    | NM_177081        | 0.126 | 1.41                |                  |         |
| <i>Fcgr3</i>    | NM_010188        | 0.128 | 2.82                |                  | ✓       |
| <i>Btk</i>      | NM_013482        | 0.136 | 1.48                |                  |         |
| <i>Cd68</i>     | NM_009853        | 0.136 | 1.77                |                  |         |
| <i>Batf</i>     | NM_016767        | 0.138 | 1.03                |                  |         |

|                |              |       |      |  |   |
|----------------|--------------|-------|------|--|---|
| <i>Oas1a</i>   | NM_145211    | 0.138 | 1.12 |  | ✓ |
| <i>Zmynd15</i> | NM_001029929 | 0.146 | 1.50 |  |   |

**Supplementary Table S7: List of skin-related genes.** The presence of SA1 and SA2 in the region 5kb upstream the TSS, as well as the clustered genes is shown.

| Gene Symbol     | Chr  | Start     | End       | Presence up to 5kb upstream TSS |               |               | Cluster |
|-----------------|------|-----------|-----------|---------------------------------|---------------|---------------|---------|
|                 |      |           |           | SA1 (SA1 +/+)                   | SA2 (SA1 +/+) | SA2 (SA1 -/-) |         |
| <i>Il1r2</i>    | chr1 | 40141613  | 40182064  |                                 |               |               | ✓       |
| <i>Ccl20</i>    | chr1 | 83113341  | 83115742  |                                 |               |               |         |
| <i>Lcn2</i>     | chr2 | 32240153  | 32243317  |                                 |               |               |         |
| <i>Il1a</i>     | chr2 | 129125346 | 129135708 |                                 |               |               | ✓       |
| <i>Il1b</i>     | chr2 | 129190306 | 129196875 |                                 |               |               | ✓       |
| <i>Mmp9</i>     | chr2 | 164766280 | 164781350 |                                 |               |               |         |
| <i>Lce1f</i>    | chr3 | 92522607  | 92524272  |                                 |               |               | ✓       |
| <i>Lce3c</i>    | chr3 | 92748408  | 92749652  |                                 |               |               | ✓       |
| <i>Tchh</i>     | chr3 | 93246252  | 93252999  |                                 |               |               | ✓       |
| <i>Ctss</i>     | chr3 | 95330708  | 95360325  |                                 |               |               | ✓       |
| <i>Mmp16</i>    | chr4 | 17780040  | 18046292  | ✓                               |               |               |         |
| <i>Ccl27a</i>   | chr4 | 41716340  | 41721120  |                                 |               |               | ✓       |
| <i>Gjb3</i>     | chr4 | 127002479 | 127008088 | ✓                               |               |               | ✓       |
| <i>Gjb5</i>     | chr4 | 127032053 | 127035425 | ✓                               |               |               | ✓       |
| <i>Mmp23</i>    | chr4 | 155024764 | 155027493 |                                 |               |               |         |
| <i>Il6</i>      | chr5 | 30339701  | 30346508  | ✓                               |               |               |         |
| <i>Cxcl5</i>    | chr5 | 91188325  | 91190651  |                                 |               |               | ✓       |
| <i>Cxcl15</i>   | chr5 | 91223560  | 91232093  | ✓                               |               |               | ✓       |
| <i>Cxcl1</i>    | chr5 | 91320267  | 91322141  |                                 |               |               | ✓       |
| <i>Cxcl2</i>    | chr5 | 91332897  | 91334935  |                                 |               |               | ✓       |
| <i>Btc</i>      | chr5 | 91786287  | 91831939  |                                 |               |               |         |
| <i>Cxcl10</i>   | chr5 | 92775664  | 92777915  |                                 |               |               | ✓       |
| <i>Cxcl13</i>   | chr5 | 96385945  | 96390086  |                                 |               |               |         |
| <i>Ccl24</i>    | chr5 | 136045807 | 136048913 |                                 |               |               | ✓       |
| <i>Tgfa</i>     | chr6 | 86145420  | 86225151  |                                 |               |               |         |
| <i>Cxcl12</i>   | chr6 | 117118553 | 117131385 | ✓                               |               | ✓             |         |
| <i>Scnn1a</i>   | chr6 | 125271358 | 125294958 |                                 |               |               |         |
| <i>Cxcl17</i>   | chr7 | 26185072  | 26197905  | ✓                               |               |               |         |
| <i>Krtdap</i>   | chr7 | 31572924  | 31576102  |                                 |               |               |         |
| <i>Ctsc</i>     | chr7 | 95426595  | 95459398  | ✓                               |               |               |         |
| <i>Itgam</i>    | chr7 | 135206154 | 135271674 |                                 |               |               | ✓       |
| <i>Krtap5-2</i> | chr7 | 149360437 | 149361910 |                                 |               |               | ✓       |
| <i>Defb1</i>    | chr8 | 22887071  | 22905657  |                                 |               |               | ✓       |
| <i>Cx3cl1</i>   | chr8 | 97295909  | 97306323  |                                 |               |               | ✓       |
| <i>Ccl17</i>    | chr8 | 97334353  | 97335935  |                                 |               |               | ✓       |
| <i>Mmp15</i>    | chr8 | 97876168  | 97898193  | ✓                               |               |               |         |
| <i>Cdh3</i>     | chr8 | 109034791 | 109080808 |                                 |               |               | ✓       |
| <i>Mmp13</i>    | chr9 | 7272514   | 7283333   |                                 |               |               | ✓       |
| <i>Mmp12</i>    | chr9 | 7344381   | 7369499   |                                 |               |               | ✓       |
| <i>Mmp3</i>     | chr9 | 7445822   | 7455972   |                                 |               |               | ✓       |
| <i>Mmp10</i>    | chr9 | 7502352   | 7510238   |                                 |               |               | ✓       |
| <i>Mmp8</i>     | chr9 | 7558429   | 7568486   | ✓                               |               |               | ✓       |
| <i>Mmp7</i>     | chr9 | 7692086   | 7699585   |                                 |               |               | ✓       |

|                  |       |           |           |   |   |   |   |
|------------------|-------|-----------|-----------|---|---|---|---|
| <i>Cx3cr1</i>    | chr9  | 119957811 | 119977400 | ✓ | ✓ |   |   |
| <i>Ccr1</i>      | chr9  | 123876959 | 123883525 |   |   |   | ✓ |
| <i>Ccr2</i>      | chr9  | 124016689 | 124028296 |   |   |   | ✓ |
| <i>Itgb2</i>     | chr10 | 76992997  | 77028453  |   |   |   |   |
| <i>Cxcl16</i>    | chr11 | 70267485  | 70273486  |   |   |   |   |
| <i>Ccl2</i>      | chr11 | 81849073  | 81850955  |   |   |   | ✓ |
| <i>Ccl11</i>     | chr11 | 81871325  | 81876457  |   |   |   | ✓ |
| <i>Ccl12</i>     | chr11 | 81915347  | 81916902  |   |   |   | ✓ |
| <i>Ccl8</i>      | chr11 | 81928687  | 81930301  |   |   |   | ✓ |
| <i>Ccl5</i>      | chr11 | 83339280  | 83344020  |   |   |   | ✓ |
| <i>Ccl9</i>      | chr11 | 83386421  | 83392138  |   |   |   | ✓ |
| <i>Ccl6</i>      | chr11 | 83401384  | 83406589  |   |   |   | ✓ |
| <i>Ccl3</i>      | chr11 | 83461346  | 83462857  |   |   |   | ✓ |
| <i>Ccl4</i>      | chr11 | 83476086  | 83478185  |   |   |   | ✓ |
| <i>Krt28</i>     | chr11 | 99226186  | 99236217  | ✓ |   | ✓ | ✓ |
| <i>Krt10</i>     | chr11 | 99246568  | 99250678  |   |   |   | ✓ |
| <i>Krt12</i>     | chr11 | 99276980  | 99283573  |   |   |   | ✓ |
| <i>Krt20</i>     | chr11 | 99289717  | 99299464  |   |   |   | ✓ |
| <i>Krtap2-4</i>  | chr11 | 99475331  | 99476160  |   |   |   | ✓ |
| <i>Krtap4-2</i>  | chr11 | 99495428  | 99496398  |   |   |   | ✓ |
| <i>Krtap4-13</i> | chr11 | 99670392  | 99671210  |   |   |   | ✓ |
| <i>Krtap31-1</i> | chr11 | 99769234  | 99770204  |   |   |   | ✓ |
| <i>Krt13</i>     | chr11 | 99978641  | 99982880  |   |   |   | ✓ |
| <i>Krt15</i>     | chr11 | 99993072  | 99997263  |   |   |   | ✓ |
| <i>Krt19</i>     | chr11 | 100002124 | 100009979 |   |   |   | ✓ |
| <i>Mmp14</i>     | chr14 | 55050441  | 55060095  | ✓ |   |   |   |
| <i>Tgm1</i>      | chr14 | 56318846  | 56332329  |   |   |   |   |
| <i>Gjb2</i>      | chr14 | 57717437  | 57723539  | ✓ | ✓ | ✓ | ✓ |
| <i>Gjb6</i>      | chr14 | 57742140  | 57752448  |   |   |   | ✓ |
| <i>Krt80</i>     | chr15 | 101177875 | 101200556 |   |   |   | ✓ |
| <i>Krt7</i>      | chr15 | 101241474 | 101260744 |   |   |   | ✓ |
| <i>Krt83</i>     | chr15 | 101261921 | 101269235 |   |   |   | ✓ |
| <i>Krt75</i>     | chr15 | 101393776 | 101404335 |   |   |   | ✓ |
| <i>Krt2</i>      | chr15 | 101641120 | 101648600 |   |   |   | ✓ |
| <i>Krt79</i>     | chr15 | 101759763 | 101770755 |   |   |   | ✓ |
| <i>Krt8</i>      | chr15 | 101827142 | 101834773 |   |   |   | ✓ |
| <i>Krt18</i>     | chr15 | 101858647 | 101862457 |   |   |   | ✓ |
| <i>Krtap15</i>   | chr16 | 88820460  | 88829729  | ✓ |   |   | ✓ |
| <i>Krtap16-7</i> | chr16 | 89403272  | 89404019  |   |   |   | ✓ |
| <i>Krtap6-2</i>  | chr16 | 89419855  | 89420322  |   |   |   | ✓ |
| <i>Hbegf</i>     | chr18 | 36664583  | 36675459  |   |   |   |   |
| <i>Fosl1</i>     | chr19 | 5447703   | 5455945   |   |   |   |   |
| <i>Il33</i>      | chr19 | 29999604  | 30035194  |   |   |   |   |
| <i>Il13ra1</i>   | chrX  | 33652105  | 33711254  |   |   |   |   |
| <i>Il2rg</i>     | chrX  | 98456744  | 98464362  |   |   |   |   |

**Table S8. Primers used for ChIP-seq validation (qPCR)**

| <b>Genomic Region</b>             | <b>Primers</b>          | <b>Sequence (5'-3')</b>                               |
|-----------------------------------|-------------------------|-------------------------------------------------------|
| Chr 15: 61,814,801 - 61,815,300   | <i>Myc</i>              | Fw ACAAATCCGAGAGCCACAAC<br>Rev TCGAGCTCATTGCACAATTC   |
| Chr 15: 61,687,900 - 61,688,400   | <i>Negative (Myc)</i>   | Fw TGGGGTACTCTGGGTTCATC<br>Rev TAGGGACTGGAAATGGCATC   |
| Chr 11: 67,817,666 - 67,818,084   | <i>11qB3</i>            | Fw TAGCTGAATTTCCCCCACTG<br>Rev CTGAATCAGCACCGACAGAA   |
| Chr 14: 84,838,181 - 84,838,727   | <i>Pcdh17</i>           | Fw TTCCCGGTGTCAATCAATTT<br>Rev TACATACTGG TCCCCCTTG   |
| Chr 5: 58,105,123 - 58,105,623    | <i>Pcdh7</i>            | Fw TTTGTCCCTTGGTGGAGTTC<br>Rev AGGGTCGGGAGTCTTTCATT   |
| Chr 18: 37,179,478 - 37,179,961   | <i>Pcdha12</i>          | Fw CCTCATGATGTGCTCTTCA<br>Rev AGCATGGTACACACGCAGAA    |
| Chr X: 117,401,147 - 117,401,603  | <i>Pcdh11X</i>          | Fw AGTCTGCTTTTGCCAGGTGT<br>Rev ACCCTGAAAATCCTCCAAGG   |
| Chr 18: 37,644,356 - 37,644,924   | <i>Pcdhb17</i>          | Fw GGCCAGTTTCTCACCACCTA<br>Rev GCAGTCTCCATGGCTCTTTC   |
| Chr 18: 37,300,013 - 37,300,550   | <i>Negative (Pcdh)</i>  | Fw GGGCGTTTTCTGAGATTGAG<br>Rev CAGGGCATTGTGCTTGTTTA   |
| Chr 18: 37,901,429 - 37,901,923   | <i>Pcdhgb6</i>          | Fw TCATAACCCCATGTTTCAGAGC<br>Rev GAGTTCCCCTTGGTGTGTGT |
| Chr 18: 37,672,967 - 37,673,448   | <i>Pcdhb21</i>          | Fw TGCAGGACAGGATGAGAGAA<br>Rev GGCAGCTCAGAGAGTGGTTC   |
| Chr 11: 100,030,172 - 100,030,721 | <i>11qD3</i>            | Fw TAGGCCAAACTGCACTTCCT<br>Rev TCCTACTCTGGCTGGGAAGA   |
| Chr 11: 99,482,356 - 99,482,857   | <i>11qD3 (Negative)</i> | FW CTTGCGGCTGAAGTTTTAGG<br>Rev CAGTTAGCAACCCTGCATGA   |
| Chr 9: 77,391,786 - 77,392,244    | <i>9qE1</i>             | Fw CAAAATGAGGAGCTCCAAGC<br>Rev GGAGAAACGTTCTGGTCCAC   |
| Chr 15: 101,732,703 - 101,733,262 | <i>15qF3</i>            | Fw CCTTGCAAACCACAGCATT<br>Rev GGGCAAGCTAATCACCTGAA    |
| Chr 10: 117,879,278 - 117,879,482 | <i>IFNg</i>             | Fw ATTTGTGGCCTTGCAGTTTC<br>Rev TATTTACCAATTGCCCTGA    |

**Supplementary Table S9: Primers used for Real Time-qPCR**

| <b>Primer</b>      | <b>Sequence (5'-3')</b>  |
|--------------------|--------------------------|
| <i>Gapdh</i> Fw    | TGCACCACCAACTGCTTAGC     |
| <i>Gapdh</i> Rev   | GAGGGGCCATCCACAGTCTTC    |
| <i>SA1</i> Fw      | AGGCTTTCATGCTGCTCTGT     |
| <i>SA1</i> Rev     | TCCATGCTTTGGTTTTCTC      |
| <i>SA2</i> Fw      | GGGGGAGGAACTGTCTTTCT     |
| <i>SA2</i> Rev     | CCTTCAATGTCTTCAAATCTGTG  |
| <i>Acpl2</i> Fw    | AAGAATGGAGGAAGCAGCAA     |
| <i>Acpl2</i> Rev   | ATGGCGAATGAACACATGAA     |
| <i>Bcl2a1b</i> Fw  | TCCCTGGCTGAGCACTATCT     |
| <i>Bcl2a1b</i> Rev | TCCACGTGAAAGTCATCCAA     |
| <i>Casp1</i> Fw    | ACCCTCAAGTTTTGCCCTTT     |
| <i>Casp1</i> Rev   | GATCCTCCAGCAGCAACTTC     |
| <i>Cxcl16</i> Fw   | GGGAAGAGTTTTACCACCA      |
| <i>Cxcl16</i> Rev  | GGTTGGGTGTGCTCTTTGTT     |
| <i>Fcer1g</i> Fw   | TGATCTCAGCCGTGATCTTG     |
| <i>Fcer1g</i> Rev  | CTGGCTATAGCTGCCTTTG      |
| <i>Sox11</i> Fw    | TCATGTTGACCTGAGCTTG      |
| <i>Sox11</i> Rev   | TAGTCGGGGAAGTGAAGTG      |
| <i>Sox9</i> Fw     | AGGAAGCTGGCAGACCAGTA     |
| <i>Sox9</i> Rev    | CGTTCTTACCGACTTCCTC      |
| <i>Myc</i> Fw      | TCGCCTCACTCAGCTCCCCT     |
| <i>Myc</i> Rev     | ACCGTCCGCTCACTCCCTCT     |
| <i>Pcdh7</i> Fw    | GACGGCTACTGCGCCTGGAT     |
| <i>Pcdh7</i> Rev   | TGGGGGTGTCCACCAGGACA     |
| <i>Pcdh17</i> Fw   | CCCAATAGGCTCTCGGCGCA     |
| <i>Pcdh17</i> Rev  | AGCGGACTGCATCTCCGAGC     |
| <i>Pcdh11X</i> Fw  | CTGCGAGCTGTGGCGGTAGA     |
| <i>Pcdh11X</i> Rev | TCTCCTGGGCGCCAGACTGA     |
| <i>Pcdhb16</i> Fw  | AGGTCTCAGCCCTCGGAAAAGGA  |
| <i>Pcdhb16</i> Rev | GAATAGCGCCTCAGTTCCCCTGC  |
| <i>Pcdhb17</i> Fw  | TGTGAAGCAAACGCCGAGGAAAGA |
| <i>Pcdhb17</i> Rev | GGAAATGATCCGAGCCCTGCGAT  |
| <i>Pcdhb20</i> Fw  | GGTATTACAGGAGCTTACCGGCA  |
| <i>Pcdhb20</i> Rev | AGCACTCGCCTGAGACAATCCC   |
| <i>Pcdhb21</i> Fw  | ACAAAGGTGGGGCACCCACAAG   |
| <i>Pcdhb21</i> Rev | TGGCAAGAACCGAGGACCCTTC   |
| <i>Pcdhb22</i> Fw  | GGTCGACCACTGTCTGGATACCC  |
| <i>Pcdhb22</i> Rev | CGAGCAGCTAGCTCCGCAAC     |



---

|                     |                       |
|---------------------|-----------------------|
| <i>Btk</i> Fw       | TGCTAAAGCAAGAGGGGAAA  |
| <i>Btk</i> Rev      | GGATGGTGCTGAAGAGGTGT  |
| <i>Ccl6</i> Fw      | GGCATTGTCACCCACTTTCT  |
| <i>Ccl6</i> Rev     | CCAGATGGCTCTAACCGTGT  |
| <i>Fyb</i> Fw       | CGATTTCCCAGACACACCTT  |
| <i>Fyb</i> Rev      | CTTGGTGCTCCATGGTCTTT  |
| <i>Zmynd15</i> Fw   | GAGAAGGTGGAACCACAGGA  |
| <i>Zmynd15</i> Rev  | GCCTCTGCATTCTTCTGTCC  |
| <i>Arhgap30</i> Fw  | AGCAGTTCTCAGCCAAGCTC  |
| <i>Arhgap30</i> Rev | GATGTGGACACCAGCACAAC  |
| <i>Pilra</i> Fw     | TTGGGGTTTTGGGATTGATA  |
| <i>Pilra</i> Rev    | GGGTTTTCTTTGGGATCCAT  |
| <i>Rin1</i> Fw      | CTCAGAGCCCAGGAACTACG  |
| <i>Rin1</i> Rev     | CCCAGGGGCTCTTTATTCTC  |
| <i>Ctss</i> Fw      | TCCCTCAGTGCTCAGAACCT  |
| <i>Ctss</i> Rev     | CTTTTCATCCGTGGCTTTGT  |
| <i>Ccl12</i> Fw     | GGGAAGCTGTGATCTTCAGG  |
| <i>Ccl12</i> Rev    | GGGAACCTCAGGGGGAAATA  |
| <i>Gjb5</i> Fw      | CCACGCATTCTATCCCAGAT  |
| <i>Gjb5</i> Rev     | TAAGCAGGATGCAGATGACG  |
| <i>Lyz1</i> Fw      | ATGGCGAACACAATGTCAAA  |
| <i>Lyz1</i> Rev     | GCCCTGTTTCTGCTGAAGTC  |
| <i>Clec4n</i> Fw    | TGAGCCCTTTCTCCTTCTGA  |
| <i>Clec4n</i> Rev   | CCACCTGGACCCTCTTACAA  |
| <i>Ptprc</i> Fw     | CCTGCTCCTCAAACCTTCGAC |
| <i>Ptprc</i> Rev    | GACACCTCTGTGCGCCTTAGC |
| <i>Itgam</i> Fw     | TACGTAATTGGGGTGGGAAA  |
| <i>Itgam</i> Rev    | GTGCCCTCAATTGCAAAGAT  |
| <i>Mmp3</i> Fw      | CAGACTTGTCCCGTTTCCAT  |
| <i>Mmp3</i> Rev     | GGTGCTGACTGCATCAAAGA  |

---
